# Supplementary material for: Identification of the key gene and pathways associated with osteoarthritis via single-cell RNA sequencing on synovial fibroblasts
Source: PubMed Central journal article supplement — Medicine (Baltimore). 2020 Aug 14;99(33):e21707. doi: 10.1097/MD.0000000000021707 (PMC7437759; doi:10.1097/md.0000000000021707), 2020-08-14
Supplement: medi-99-e21707-s001.pdf [file medi-99-e21707-s001.pdf]

| p_val    | avg_logFC | pct.1 | pct.2 | p_val_adj | cluster | gene       |
|----------|-----------|-------|-------|-----------|---------|------------|
| 5.91E-11 | 0.561512  | 1     | 0.896 | 1.51E-06  | 0       | ITGBL1     |
| 9.28E-10 | 1.087071  | 0.932 | 0.708 | 2.36E-05  | 0       | MMP3       |
| 1.03E-09 | 0.719845  | 0.811 | 0.5   | 2.63E-05  | 0       | DIRC3      |
| 2.87E-09 | 0.748637  | 1     | 1     | 7.32E-05  | 0       | PRG4       |
| 1.48E-08 | 0.698028  | 0.973 | 0.719 | 0.000378  | 0       | SDC2       |
| 1.67E-08 | 0.709153  | 1     | 1     | 0.000425  | 0       | FN1        |
| 4.21E-08 | 0.746646  | 0.649 | 0.24  | 0.001072  | 0       | OLFM3      |
| 1.01E-07 | 0.609834  | 1     | 0.844 | 0.002579  | 0       | SPARCL1    |
| 1.53E-07 | 0.549332  | 1     | 0.844 | 0.003895  | 0       | HLA-B      |
| 2.21E-07 | 0.501054  | 0.986 | 0.885 | 0.005636  | 0       | ANK3       |
| 6.90E-07 | 0.556613  | 1     | 0.76  | 0.017573  | 0       | CRTAC1     |
| 1.05E-06 | 0.505699  | 0.986 | 0.865 | 0.026694  | 0       | CAV1       |
| 1.13E-06 | 0.520578  | 0.959 | 0.885 | 0.028907  | 0       | SCARA5     |
| 1.74E-06 | 0.554856  | 1     | 0.729 | 0.044393  | 0       | SLC39A14   |
| 2.34E-18 | -1.55056  | 1     | 1     | 5.97E-14  | 1       | ZNF470     |
| 3.72E-18 | -1.95102  | 1     | 1     | 9.48E-14  | 1       | AL512646.1 |
| 4.84E-18 | -1.94865  | 1     | 1     | 1.23E-13  | 1       | MYADML     |
| 7.17E-18 | -1.02199  | 1     | 1     | 1.83E-13  | 1       | AC090142.2 |
| 8.72E-18 | -1.05575  | 1     | 1     | 2.22E-13  | 1       | NUP214     |
| 1.03E-17 | -1.48693  | 1     | 1     | 2.61E-13  | 1       | RYR3       |
| 1.13E-17 | -1.63944  | 1     | 1     | 2.88E-13  | 1       | APOOL      |
| 1.17E-17 | -0.96392  | 1     | 1     | 2.97E-13  | 1       | MIXL1      |
| 1.37E-17 | -1.48053  | 0.974 | 1     | 3.50E-13  | 1       | GPLD1      |
| 1.56E-17 | -1.65434  | 1     | 1     | 3.98E-13  | 1       | UBE2O      |
| 1.84E-17 | -0.88609  | 1     | 1     | 4.68E-13  | 1       | CELF5      |
| 2.88E-17 | -1.58786  | 1     | 1     | 7.33E-13  | 1       | NOVA1      |
| 6.70E-17 | -0.78848  | 0.921 | 0.992 | 1.71E-12  | 1       | RPS14P4    |
| 7.02E-17 | -1.77409  | 1     | 1     | 1.79E-12  | 1       | HIF3A      |
| 9.04E-17 | -1.15999  | 1     | 1     | 2.30E-12  | 1       | BPHL       |
| 1.20E-16 | -0.76095  | 1     | 1     | 3.06E-12  | 1       | ARL4C      |
| 1.70E-16 | -1.68816  | 1     | 1     | 4.32E-12  | 1       | UPK3BL1    |
| 5.34E-16 | -1.3045   | 1     | 1     | 1.36E-11  | 1       | KPNA2P2    |
| 6.62E-16 | -1.14743  | 1     | 1     | 1.69E-11  | 1       | ZHX1       |
| 1.22E-15 | -0.58296  | 1     | 1     | 3.11E-11  | 1       | AC125604.1 |
| 2.10E-15 | -1.09726  | 1     | 1     | 5.35E-11  | 1       | CARD8      |
| 4.58E-15 | -0.89374  | 1     | 1     | 1.17E-10  | 1       | PRMT1      |
| 7.81E-15 | -0.58424  | 1     | 1     | 1.99E-10  | 1       | LCMT2      |
| 1.25E-14 | -0.82951  | 1     | 1     | 3.19E-10  | 1       | SUGT1      |
| 1.63E-14 | -1.208    | 1     | 1     | 4.15E-10  | 1       | TRIM41     |
| 1.68E-14 | -0.85977  | 1     | 1     | 4.27E-10  | 1       | ERCC4      |
| 6.14E-14 | -0.80317  | 1     | 1     | 1.56E-09  | 1       | SPG21      |
| 6.88E-14 | -1.07915  | 1     | 1     | 1.75E-09  | 1       | MIA2       |
| 1.15E-13 | -0.73546  | 1     | 0.985 | 2.92E-09  | 1       | LANCL3     |
| 2.01E-13 | -0.61998  | 1     | 1     | 5.13E-09  | 1       | SMAGP      |
| 1.14E-12 | -1.06698  | 1     | 1     | 2.91E-08  | 1       | KXD1       |
| 1.50E-12 | -1.04255  | 0.947 | 1     | 3.81E-08  | 1       | EPS15L1    |
| 1.81E-12 | -1.09438  | 1     | 1     | 4.60E-08  | 1       | DCAF10     |
| 1.85E-12 | -0.52582  | 1     | 0.992 | 4.72E-08  | 1       | CCR4       |
| 2.18E-12 | -0.76192  | 1     | 1     | 5.55E-08  | 1       | AC006509.1 |
| 2.42E-12 | -0.52651  | 1     | 1     | 6.18E-08  | 1       | TBC1D7     |
| 3.15E-12 | -1.41261  | 0.974 | 0.939 | 8.03E-08  | 1       | USP28      |
| 3.43E-12 | -0.83081  | 1     | 1     | 8.73E-08  | 1       | MRPL42     |
| 6.29E-12 | -0.56825  | 1     | 1     | 1.60E-07  | 1       | ASAP1      |
| 6.29E-12 | -0.97933  | 1     | 1     | 1.60E-07  | 1       | ZNF84      |
| 6.29E-12 | -1.15674  | 1     | 1     | 1.60E-07  | 1       | GPALPP1    |
| 1.09E-11 | 0.980279  | 1     | 0.939 | 2.76E-07  | 1       | CD164      |
| 1.15E-11 | -0.7974   | 1     | 1     | 2.92E-07  | 1       | FNIP1      |

|          |          |       |       |          |              |
|----------|----------|-------|-------|----------|--------------|
| 1.97E-11 | 0.588293 | 1     | 1     | 5.01E-07 | 1 AC010970.1 |
| 2.18E-11 | 1.062266 | 1     | 0.977 | 5.55E-07 | 1 CD55       |
| 4.01E-11 | -0.51926 | 1     | 1     | 1.02E-06 | 1 RPP30      |
| 4.23E-11 | 1.130201 | 0.974 | 0.735 | 1.08E-06 | 1 TWISTNB    |
| 4.58E-11 | 0.677415 | 1     | 0.879 | 1.17E-06 | 1 CALU       |
| 6.00E-11 | -0.7854  | 0.947 | 0.985 | 1.53E-06 | 1 GTF3C5     |
| 7.15E-11 | 0.764515 | 1     | 0.742 | 1.82E-06 | 1 COL4A1     |
| 8.72E-11 | -0.9075  | 1     | 1     | 2.22E-06 | 1 RPL7L1     |
| 1.01E-10 | 0.689142 | 1     | 0.932 | 2.57E-06 | 1 P4HB       |
| 1.03E-10 | 0.567892 | 1     | 0.818 | 2.61E-06 | 1 PLIN3      |
| 1.14E-10 | 0.83126  | 1     | 0.659 | 2.91E-06 | 1 SLC7A8     |
| 1.17E-10 | -0.86137 | 1     | 1     | 2.99E-06 | 1 SNRPD1     |
| 1.41E-10 | 1.012461 | 0.974 | 0.803 | 3.60E-06 | 1 INHBA      |
| 1.58E-10 | -0.72803 | 1     | 1     | 4.01E-06 | 1 TRA2A      |
| 1.61E-10 | 0.670696 | 1     | 0.917 | 4.09E-06 | 1 VKORC1     |
| 2.31E-10 | 0.699821 | 1     | 0.848 | 5.87E-06 | 1 RPN2       |
| 2.76E-10 | -0.60524 | 1     | 1     | 7.02E-06 | 1 TTC7B      |
| 2.96E-10 | -0.51122 | 1     | 0.992 | 7.55E-06 | 1 ZNF836     |
| 3.86E-10 | -0.52924 | 1     | 1     | 9.84E-06 | 1 AFMID      |
| 4.42E-10 | 0.805635 | 1     | 0.795 | 1.13E-05 | 1 SLC29A1    |
| 4.57E-10 | 0.674088 | 1     | 0.864 | 1.16E-05 | 1 TUBA1B     |
| 5.32E-10 | -0.57287 | 0.921 | 0.962 | 1.36E-05 | 1 AP002981.1 |
| 6.08E-10 | -0.68849 | 1     | 0.992 | 1.55E-05 | 1 PBLD       |
| 7.48E-10 | 0.657595 | 1     | 0.917 | 1.91E-05 | 1 GAPDH      |
| 1.56E-09 | 0.942655 | 1     | 0.879 | 3.98E-05 | 1 TIMP1      |
| 2.19E-09 | 0.903032 | 1     | 0.962 | 5.59E-05 | 1 TNC        |
| 2.19E-09 | 0.604574 | 1     | 1     | 5.59E-05 | 1 APLP2      |
| 2.30E-09 | -0.52379 | 1     | 0.992 | 5.85E-05 | 1 ZNF317     |
| 2.71E-09 | 0.983952 | 1     | 0.667 | 6.89E-05 | 1 HBEGF      |
| 2.78E-09 | 0.544188 | 1     | 0.833 | 7.07E-05 | 1 MORF4L2    |
| 2.96E-09 | 0.709846 | 1     | 0.712 | 7.55E-05 | 1 ELOVL5     |
| 3.10E-09 | 0.556735 | 1     | 0.803 | 7.91E-05 | 1 RCN3       |
| 3.16E-09 | 0.557544 | 1     | 0.939 | 8.04E-05 | 1 RPN1       |
| 4.34E-09 | -0.52698 | 1     | 0.992 | 0.000111 | 1 MT1X       |
| 4.68E-09 | 0.511403 | 1     | 0.833 | 0.000119 | 1 RAB1A      |
| 6.31E-09 | 0.78122  | 1     | 0.902 | 0.000161 | 1 COL5A2     |
| 7.94E-09 | 0.589837 | 1     | 0.856 | 0.000202 | 1 PDIA3      |
| 9.70E-09 | -0.53089 | 1     | 1     | 0.000247 | 1 MT-ND1     |
| 9.89E-09 | 0.606686 | 1     | 0.924 | 0.000252 | 1 ADAM10     |
| 1.06E-08 | 0.523714 | 1     | 0.818 | 0.000269 | 1 LMAN1      |
| 1.31E-08 | 0.607264 | 1     | 0.917 | 0.000335 | 1 ENPP1      |
| 1.46E-08 | 0.612108 | 1     | 0.848 | 0.000373 | 1 CD9        |
| 1.47E-08 | 0.78493  | 1     | 0.939 | 0.000374 | 1 BZW1       |
| 1.54E-08 | 0.568228 | 1     | 0.985 | 0.000392 | 1 CLTC       |
| 1.55E-08 | 0.599982 | 1     | 0.803 | 0.000394 | 1 TAGLN2     |
| 1.89E-08 | 0.541748 | 1     | 0.886 | 0.000481 | 1 HSP90B1    |
| 2.15E-08 | 0.592849 | 1     | 0.886 | 0.000548 | 1 ITGB1      |
| 2.26E-08 | 0.541326 | 1     | 0.924 | 0.000577 | 1 CD68       |
| 2.70E-08 | -0.54444 | 1     | 1     | 0.000687 | 1 DIP2A      |
| 3.48E-08 | 0.72404  | 1     | 0.97  | 0.000887 | 1 ANKH       |
| 3.69E-08 | 0.50037  | 1     | 0.902 | 0.000939 | 1 DDOST      |
| 4.04E-08 | 0.526519 | 1     | 0.818 | 0.001028 | 1 PDIA6      |
| 4.13E-08 | 0.540724 | 1     | 1     | 0.001052 | 1 ALDOA      |
| 4.18E-08 | 0.521331 | 1     | 0.894 | 0.001065 | 1 PLOD1      |
| 4.35E-08 | 0.711099 | 1     | 0.833 | 0.001107 | 1 FAM49A     |
| 5.17E-08 | 0.502743 | 1     | 0.811 | 0.001318 | 1 COPG1      |
| 6.48E-08 | 0.769322 | 1     | 0.667 | 0.00165  | 1 CEMIP      |
| 7.12E-08 | 0.606533 | 1     | 0.818 | 0.001814 | 1 ANGPTL2    |

|          |          |       |       |          |   |          |
|----------|----------|-------|-------|----------|---|----------|
| 7.27E-08 | 0.625301 | 1     | 0.97  | 0.001853 | 1 | UGDH     |
| 8.77E-08 | 0.616777 | 1     | 1     | 0.002233 | 1 | FN1      |
| 8.95E-08 | -0.96375 | 1     | 1     | 0.00228  | 1 | OPA3     |
| 9.46E-08 | 0.819774 | 1     | 0.902 | 0.002409 | 1 | VCAM1    |
| 1.00E-07 | 0.723504 | 1     | 0.894 | 0.002559 | 1 | SEMA3A   |
| 1.17E-07 | 0.595082 | 0.868 | 0.553 | 0.002991 | 1 | COL22A1  |
| 1.21E-07 | 0.936966 | 0.658 | 0.227 | 0.003092 | 1 | CXCL1    |
| 1.28E-07 | 0.581241 | 1     | 0.871 | 0.003252 | 1 | DNASE1L3 |
| 1.43E-07 | 0.527457 | 1     | 0.992 | 0.003653 | 1 | ITGB8    |
| 1.61E-07 | 0.698221 | 0.763 | 0.417 | 0.0041   | 1 | ITPR3    |
| 1.65E-07 | 0.576721 | 1     | 0.811 | 0.004191 | 1 | PGM3     |
| 1.72E-07 | -0.67601 | 1     | 1     | 0.004384 | 1 | CLDN11   |
| 1.78E-07 | 0.593513 | 1     | 0.811 | 0.004545 | 1 | ISLR     |
| 1.94E-07 | 0.568163 | 1     | 0.977 | 0.004949 | 1 | ABI3BP   |
| 2.34E-07 | 1.090197 | 0.974 | 0.833 | 0.005964 | 1 | RCAN1    |
| 2.69E-07 | 0.559614 | 1     | 0.871 | 0.006862 | 1 | ENO1     |
| 2.83E-07 | 0.780972 | 0.789 | 0.386 | 0.007196 | 1 | F5       |
| 3.19E-07 | 0.735388 | 1     | 0.917 | 0.008124 | 1 | TIMP3    |
| 3.27E-07 | 0.592375 | 1     | 0.985 | 0.008316 | 1 | CLU      |
| 4.18E-07 | 0.508824 | 1     | 0.886 | 0.010647 | 1 | ARID5B   |
| 4.82E-07 | 0.599745 | 1     | 0.917 | 0.012278 | 1 | SULF1    |
| 4.89E-07 | 0.513262 | 0.816 | 0.614 | 0.012449 | 1 | DAW1     |
| 5.13E-07 | 0.534295 | 1     | 0.992 | 0.013063 | 1 | BCAT1    |
| 6.43E-07 | 0.583349 | 1     | 0.742 | 0.016382 | 1 | TSC22D3  |
| 6.60E-07 | 0.639977 | 1     | 1     | 0.016808 | 1 | PRG4     |
| 7.99E-07 | 0.72605  | 1     | 0.947 | 0.020355 | 1 | THBS4    |
| 1.04E-06 | 0.619366 | 1     | 0.894 | 0.026424 | 1 | HTRA1    |
| 1.08E-06 | 0.549363 | 1     | 0.902 | 0.027484 | 1 | CLIC4    |
| 1.13E-06 | 0.500898 | 1     | 0.977 | 0.028701 | 1 | LDHA     |
| 1.23E-06 | 0.63787  | 0.842 | 0.5   | 0.031414 | 1 | RGS16    |
| 1.30E-06 | 0.627816 | 0.737 | 0.341 | 0.033169 | 1 | RGS2     |
| 1.35E-06 | 0.638764 | 1     | 0.886 | 0.034371 | 1 | SPARCL1  |
| 8.85E-19 | -2.63597 | 0.97  | 1     | 2.25E-14 | 2 | COL1A2   |
| 2.94E-18 | -1.75174 | 0.576 | 0.993 | 7.48E-14 | 2 | LGALS3BP |
| 3.84E-18 | -1.52288 | 0.939 | 1     | 9.79E-14 | 2 | LRP1     |
| 6.22E-18 | -1.99097 | 0.364 | 1     | 1.58E-13 | 2 | TXNIP    |
| 7.93E-18 | -2.05847 | 0.879 | 1     | 2.02E-13 | 2 | C1S      |
| 1.10E-17 | -1.87237 | 0.394 | 0.985 | 2.81E-13 | 2 | PMP22    |
| 1.37E-17 | -1.81969 | 0.97  | 1     | 3.49E-13 | 2 | HSPA5    |
| 1.61E-17 | -1.68993 | 0.515 | 0.985 | 4.10E-13 | 2 | PROS1    |
| 2.06E-17 | -3.12494 | 0.848 | 1     | 5.25E-13 | 2 | COL3A1   |
| 2.61E-17 | -1.98901 | 0.515 | 0.993 | 6.64E-13 | 2 | PLTP     |
| 2.89E-17 | -1.30027 | 0.939 | 1     | 7.36E-13 | 2 | C6orf62  |
| 3.65E-17 | -1.50274 | 0.818 | 1     | 9.31E-13 | 2 | H3F3B    |
| 8.17E-17 | -2.04499 | 0.879 | 1     | 2.08E-12 | 2 | PSAP     |
| 9.22E-17 | -2.39846 | 0.545 | 0.993 | 2.35E-12 | 2 | LUM      |
| 1.26E-16 | -1.40332 | 0.394 | 0.993 | 3.21E-12 | 2 | TM9SF2   |
| 1.51E-16 | -1.16365 | 0.606 | 1     | 3.85E-12 | 2 | HNRNPK   |
| 2.51E-16 | 1.14816  | 1     | 1     | 6.39E-12 | 2 | RYR3     |
| 2.96E-16 | -1.20964 | 0.97  | 1     | 7.53E-12 | 2 | CALM2    |
| 4.17E-16 | -2.46779 | 0.636 | 0.993 | 1.06E-11 | 2 | VCAM1    |
| 6.53E-16 | -2.08069 | 0.788 | 0.993 | 1.66E-11 | 2 | EFEMP1   |
| 7.14E-16 | -1.06088 | 0.152 | 0.971 | 1.82E-11 | 2 | GRN      |
| 8.08E-16 | 1.036545 | 1     | 1     | 2.06E-11 | 2 | ZHX1     |
| 8.88E-16 | -1.34236 | 0.606 | 0.993 | 2.26E-11 | 2 | PCYOX1   |
| 9.14E-16 | -1.60645 | 0.424 | 0.993 | 2.33E-11 | 2 | RPN2     |
| 9.67E-16 | -1.36859 | 0.455 | 0.993 | 2.46E-11 | 2 | KDEL2    |
| 1.08E-15 | -1.54814 | 0.909 | 1     | 2.75E-11 | 2 | ANXA2    |

|          |          |       |       |          |              |
|----------|----------|-------|-------|----------|--------------|
| 1.22E-15 | -1.03866 | 0.515 | 0.985 | 3.10E-11 | 2 LAMP2      |
| 1.53E-15 | -1.59926 | 0.758 | 0.993 | 3.89E-11 | 2 UBC        |
| 1.58E-15 | 1.197699 | 1     | 1     | 4.03E-11 | 2 ZNF470     |
| 1.64E-15 | 0.926524 | 1     | 1     | 4.16E-11 | 2 PRMT1      |
| 1.67E-15 | -0.68714 | 0.212 | 0.949 | 4.24E-11 | 2 GAA        |
| 2.63E-15 | 0.916993 | 1     | 1     | 6.71E-11 | 2 SUGT1      |
| 2.69E-15 | -0.73018 | 0.212 | 0.92  | 6.84E-11 | 2 ESD        |
| 2.89E-15 | 1.243275 | 1     | 0.993 | 7.37E-11 | 2 GPLD1      |
| 3.72E-15 | 1.034429 | 1     | 1     | 9.49E-11 | 2 CARD8      |
| 4.02E-15 | -1.22959 | 0.212 | 1     | 1.02E-10 | 2 ATP6AP2    |
| 4.23E-15 | -0.64182 | 0.303 | 0.964 | 1.08E-10 | 2 CTSL       |
| 4.41E-15 | -1.79818 | 0.788 | 0.993 | 1.12E-10 | 2 C1R        |
| 5.31E-15 | -1.39657 | 0.545 | 1     | 1.35E-10 | 2 HLA-B      |
| 5.78E-15 | -1.48893 | 0.909 | 1     | 1.47E-10 | 2 ABI3BP     |
| 5.78E-15 | 0.645366 | 1     | 1     | 1.47E-10 | 2 AC125604.1 |
| 6.61E-15 | -0.67085 | 0.606 | 0.985 | 1.68E-10 | 2 MDH1       |
| 8.10E-15 | -0.65638 | 0.515 | 0.985 | 2.06E-10 | 2 GANAB      |
| 9.25E-15 | -1.13125 | 0.242 | 0.978 | 2.36E-10 | 2 SERPING1   |
| 9.76E-15 | -1.36843 | 0.727 | 1     | 2.49E-10 | 2 P4HB       |
| 1.08E-14 | -2.50457 | 1     | 1     | 2.74E-10 | 2 FN1        |
| 1.13E-14 | -1.68134 | 0.394 | 0.978 | 2.88E-10 | 2 SELENOP    |
| 1.18E-14 | 0.917817 | 1     | 1     | 3.01E-10 | 2 MRPL42     |
| 1.18E-14 | -1.05979 | 0.606 | 0.971 | 3.01E-10 | 2 GPX8       |
| 1.61E-14 | 1.194703 | 1     | 1     | 4.09E-10 | 2 APOOL      |
| 1.82E-14 | 1.159022 | 1     | 1     | 4.63E-10 | 2 NOVA1      |
| 1.87E-14 | -1.47904 | 0.879 | 1     | 4.77E-10 | 2 ACTB       |
| 1.89E-14 | -1.57063 | 0.727 | 0.993 | 4.82E-10 | 2 ACTG1      |
| 1.91E-14 | -1.03799 | 0.091 | 0.883 | 4.87E-10 | 2 C4A        |
| 2.01E-14 | -0.69147 | 0.182 | 0.912 | 5.11E-10 | 2 CCT4       |
| 2.02E-14 | -1.39241 | 0.848 | 0.993 | 5.15E-10 | 2 PCOLCE     |
| 2.29E-14 | -0.59063 | 0.212 | 0.956 | 5.83E-10 | 2 ATP6V1G1   |
| 2.43E-14 | -0.63624 | 0.212 | 0.956 | 6.20E-10 | 2 ILK        |
| 2.78E-14 | -1.0045  | 0.758 | 1     | 7.08E-10 | 2 YWHAZ      |
| 2.88E-14 | -1.29921 | 0.485 | 1     | 7.33E-10 | 2 ARL6IP5    |
| 2.98E-14 | -1.37296 | 0.515 | 1     | 7.59E-10 | 2 LAPTM4A    |
| 3.25E-14 | 1.219274 | 1     | 1     | 8.27E-10 | 2 HIF3A      |
| 3.61E-14 | -0.81568 | 0.636 | 0.985 | 9.19E-10 | 2 DNAJC3     |
| 3.66E-14 | -1.41659 | 0.818 | 1     | 9.33E-10 | 2 CANX       |
| 3.77E-14 | -0.8334  | 0.394 | 0.964 | 9.61E-10 | 2 TMEM43     |
| 3.95E-14 | -0.91835 | 0.364 | 0.993 | 1.01E-09 | 2 RAB1A      |
| 4.01E-14 | -1.03888 | 0.485 | 0.942 | 1.02E-09 | 2 COPG1      |
| 4.04E-14 | -0.81876 | 0.485 | 0.971 | 1.03E-09 | 2 DCTN2      |
| 4.27E-14 | 0.928907 | 1     | 1     | 1.09E-09 | 2 CELF5      |
| 4.67E-14 | 1.024973 | 1     | 1     | 1.19E-09 | 2 MIA2       |
| 5.20E-14 | -1.19692 | 0.121 | 0.912 | 1.32E-09 | 2 C4B        |
| 5.75E-14 | -0.50448 | 0.515 | 0.985 | 1.46E-09 | 2 SERPINH1   |
| 5.77E-14 | -1.60218 | 0.909 | 1     | 1.47E-09 | 2 FSTL1      |
| 6.31E-14 | 0.869566 | 1     | 1     | 1.61E-09 | 2 ERCC4      |
| 6.50E-14 | -1.32609 | 0.273 | 0.993 | 1.66E-09 | 2 ISLR       |
| 7.39E-14 | -0.71837 | 0.364 | 0.927 | 1.88E-09 | 2 TAF7       |
| 7.54E-14 | -1.44185 | 0.758 | 1     | 1.92E-09 | 2 BZW1       |
| 7.88E-14 | -1.16033 | 0.273 | 0.927 | 2.01E-09 | 2 CFB        |
| 8.71E-14 | -0.65688 | 0.697 | 0.993 | 2.22E-09 | 2 TMBIM1     |
| 8.90E-14 | -1.48421 | 0.515 | 0.971 | 2.27E-09 | 2 CD9        |
| 9.32E-14 | 1.283137 | 1     | 1     | 2.37E-09 | 2 AL512646.1 |
| 9.41E-14 | -1.43902 | 0.394 | 0.934 | 2.40E-09 | 2 LTBP1      |
| 9.62E-14 | -0.84645 | 0.485 | 1     | 2.45E-09 | 2 OS9        |
| 9.89E-14 | 0.675303 | 1     | 1     | 2.52E-09 | 2 AFMID      |

|          |          |       |       |          |              |
|----------|----------|-------|-------|----------|--------------|
| 1.02E-13 | -0.82659 | 0.242 | 0.934 | 2.59E-09 | 2 NCSTN      |
| 1.02E-13 | -1.00177 | 0.424 | 0.956 | 2.60E-09 | 2 GNG12      |
| 1.06E-13 | -0.7423  | 0.303 | 0.942 | 2.70E-09 | 2 TMEM50A    |
| 1.15E-13 | -0.78889 | 0.364 | 0.905 | 2.92E-09 | 2 SARS       |
| 1.18E-13 | 0.892492 | 1     | 1     | 3.01E-09 | 2 NUP214     |
| 1.24E-13 | -0.93122 | 0.606 | 1     | 3.16E-09 | 2 NPTN       |
| 1.35E-13 | -0.67858 | 0.121 | 0.883 | 3.45E-09 | 2 ACLY       |
| 1.37E-13 | -0.87253 | 0.848 | 1     | 3.49E-09 | 2 MAGT1      |
| 1.37E-13 | -0.73011 | 0.879 | 1     | 3.49E-09 | 2 METTL7A    |
| 1.38E-13 | -0.70115 | 0.333 | 0.934 | 3.53E-09 | 2 SRP72      |
| 1.45E-13 | -0.74594 | 0.152 | 0.898 | 3.69E-09 | 2 SNX17      |
| 1.48E-13 | -0.95176 | 0.636 | 0.993 | 3.77E-09 | 2 DDOST      |
| 1.50E-13 | 0.920341 | 1     | 1     | 3.82E-09 | 2 KXD1       |
| 1.52E-13 | -0.98269 | 0.606 | 0.985 | 3.86E-09 | 2 LAMB2      |
| 1.52E-13 | -1.01447 | 0.697 | 0.971 | 3.88E-09 | 2 PLOD1      |
| 1.54E-13 | -0.73747 | 0.758 | 0.993 | 3.92E-09 | 2 NDFIP1     |
| 1.63E-13 | -1.18855 | 0.545 | 0.993 | 4.14E-09 | 2 CNBP       |
| 1.64E-13 | -1.55198 | 1     | 1     | 4.18E-09 | 2 AC010970.1 |
| 1.65E-13 | -0.81851 | 0.364 | 0.949 | 4.22E-09 | 2 SNX2       |
| 1.76E-13 | -1.27181 | 0.727 | 0.993 | 4.47E-09 | 2 CFI        |
| 1.76E-13 | -0.98161 | 0.303 | 0.964 | 4.47E-09 | 2 PIGT       |
| 1.84E-13 | -0.76823 | 0.333 | 0.905 | 4.68E-09 | 2 PCMT1      |
| 1.84E-13 | -0.91488 | 0.818 | 1     | 4.69E-09 | 2 LGALS3     |
| 1.86E-13 | -0.99181 | 0.424 | 0.912 | 4.75E-09 | 2 RAB2A      |
| 1.96E-13 | 0.756145 | 1     | 0.971 | 4.98E-09 | 2 RPS14P4    |
| 1.97E-13 | -0.53883 | 0.515 | 0.964 | 5.02E-09 | 2 COPS6      |
| 2.02E-13 | 0.52659  | 1     | 1     | 5.13E-09 | 2 MMACHC     |
| 2.03E-13 | -0.80734 | 0.061 | 0.883 | 5.16E-09 | 2 PRNP       |
| 2.04E-13 | -0.84916 | 0.303 | 0.949 | 5.19E-09 | 2 SH3BGRL    |
| 2.08E-13 | 0.685151 | 1     | 1     | 5.29E-09 | 2 SMAGP      |
| 2.15E-13 | -0.57155 | 0.424 | 0.985 | 5.49E-09 | 2 COL6A1     |
| 2.23E-13 | -0.92606 | 0.485 | 0.993 | 5.67E-09 | 2 HLA-C      |
| 2.26E-13 | -0.7745  | 0.788 | 1     | 5.77E-09 | 2 XRCC6      |
| 2.43E-13 | -0.84975 | 0.303 | 0.956 | 6.20E-09 | 2 SURF4      |
| 2.47E-13 | -1.036   | 0.273 | 0.956 | 6.29E-09 | 2 C5orf15    |
| 2.56E-13 | -0.59393 | 0.333 | 0.898 | 6.53E-09 | 2 MMADHC     |
| 2.87E-13 | -1.03699 | 0.485 | 0.978 | 7.30E-09 | 2 TUBB       |
| 2.95E-13 | -0.7469  | 0.606 | 0.993 | 7.52E-09 | 2 H3F3A      |
| 2.95E-13 | 0.857474 | 1     | 1     | 7.52E-09 | 2 SPG21      |
| 3.12E-13 | -0.97892 | 0.455 | 1     | 7.95E-09 | 2 ARF1       |
| 3.21E-13 | -0.88243 | 0.121 | 0.847 | 8.17E-09 | 2 HNRNPH2    |
| 3.21E-13 | -0.73719 | 0.273 | 0.971 | 8.18E-09 | 2 PTTG1IP    |
| 3.32E-13 | -0.66383 | 0.606 | 0.949 | 8.45E-09 | 2 COPZ1      |
| 3.36E-13 | -0.61489 | 0.394 | 0.971 | 8.55E-09 | 2 PRDX6      |
| 3.54E-13 | -0.67383 | 0.212 | 0.927 | 9.02E-09 | 2 TPP1       |
| 3.94E-13 | -0.84966 | 0.273 | 0.891 | 1.00E-08 | 2 ALDH9A1    |
| 4.07E-13 | 0.547031 | 1     | 1     | 1.04E-08 | 2 PIM2       |
| 4.24E-13 | -0.90229 | 0.515 | 0.942 | 1.08E-08 | 2 PLIN3      |
| 4.31E-13 | 0.951382 | 1     | 1     | 1.10E-08 | 2 MIXL1      |
| 4.75E-13 | -0.68123 | 0.333 | 0.964 | 1.21E-08 | 2 ANXA6      |
| 4.99E-13 | -2.10193 | 0.879 | 0.993 | 1.27E-08 | 2 TNC        |
| 5.00E-13 | -1.01268 | 0.576 | 0.978 | 1.27E-08 | 2 SEC61A1    |
| 5.15E-13 | -0.86476 | 0.333 | 0.978 | 1.31E-08 | 2 PDIA4      |
| 5.29E-13 | -2.71256 | 1     | 1     | 1.35E-08 | 2 PRG4       |
| 5.44E-13 | -0.77508 | 0.485 | 0.978 | 1.39E-08 | 2 XRCC5      |
| 5.62E-13 | -1.01689 | 0.394 | 0.964 | 1.43E-08 | 2 OAT        |
| 5.76E-13 | -1.0217  | 0.879 | 1     | 1.47E-08 | 2 TMBIM6     |
| 5.89E-13 | -0.89083 | 0.455 | 0.993 | 1.50E-08 | 2 UBB        |

|          |          |       |       |          |              |
|----------|----------|-------|-------|----------|--------------|
| 6.02E-13 | -0.84308 | 0.515 | 0.971 | 1.53E-08 | 2 NNMT       |
| 8.13E-13 | -0.80257 | 0.788 | 1     | 2.07E-08 | 2 PLD3       |
| 8.15E-13 | 0.912501 | 1     | 1     | 2.08E-08 | 2 CLDN11     |
| 8.41E-13 | -0.6682  | 0.364 | 0.971 | 2.14E-08 | 2 CLIC1      |
| 8.43E-13 | -0.5835  | 0.667 | 0.993 | 2.15E-08 | 2 PPP2R1A    |
| 8.62E-13 | -0.74314 | 0.333 | 0.956 | 2.19E-08 | 2 IGFBP4     |
| 8.67E-13 | -0.82141 | 0.273 | 0.883 | 2.21E-08 | 2 SCAMP1     |
| 8.69E-13 | -0.74285 | 0.182 | 0.898 | 2.21E-08 | 2 HEXB       |
| 8.78E-13 | -1.6299  | 0.636 | 0.993 | 2.24E-08 | 2 COL5A2     |
| 9.55E-13 | -0.71125 | 0.424 | 0.978 | 2.43E-08 | 2 VSIR       |
| 1.01E-12 | -1.84286 | 0.455 | 0.956 | 2.57E-08 | 2 CCN2       |
| 1.05E-12 | -0.78857 | 0.182 | 0.905 | 2.66E-08 | 2 NCOA4      |
| 1.05E-12 | 1.043566 | 1     | 1     | 2.69E-08 | 2 KPNA2P2    |
| 1.13E-12 | -0.51344 | 0.333 | 0.92  | 2.88E-08 | 2 PSMD13     |
| 1.14E-12 | -1.04283 | 0.697 | 0.985 | 2.90E-08 | 2 COL1A1     |
| 1.15E-12 | -0.90841 | 0.788 | 1     | 2.92E-08 | 2 STT3A      |
| 1.16E-12 | -0.76334 | 0.091 | 0.847 | 2.97E-08 | 2 PDGFRL     |
| 1.21E-12 | -1.68449 | 0.697 | 0.993 | 3.08E-08 | 2 TIMP3      |
| 1.32E-12 | -0.52331 | 0.091 | 0.825 | 3.37E-08 | 2 APMAP      |
| 1.34E-12 | -0.9935  | 0.242 | 0.993 | 3.40E-08 | 2 CTSD       |
| 1.41E-12 | -0.7266  | 0.455 | 0.949 | 3.59E-08 | 2 CCT3       |
| 1.55E-12 | -0.72927 | 0.364 | 0.949 | 3.95E-08 | 2 TOMM20     |
| 1.57E-12 | -0.83648 | 0.909 | 1     | 4.00E-08 | 2 CTSB       |
| 1.62E-12 | -0.69307 | 0.424 | 0.956 | 4.14E-08 | 2 TSPAN3     |
| 1.66E-12 | -0.92075 | 0.606 | 0.993 | 4.24E-08 | 2 CTSA       |
| 1.69E-12 | -0.54874 | 0.182 | 0.985 | 4.30E-08 | 2 MYL12B     |
| 1.76E-12 | 0.944168 | 1     | 1     | 4.48E-08 | 2 BPHL       |
| 1.76E-12 | 0.856875 | 1     | 1     | 4.48E-08 | 2 FNIP1      |
| 1.76E-12 | 0.626305 | 1     | 1     | 4.48E-08 | 2 TBC1D7     |
| 1.81E-12 | -0.50337 | 0.909 | 1     | 4.61E-08 | 2 RPL30      |
| 1.81E-12 | 0.737556 | 1     | 1     | 4.61E-08 | 2 AC006509.1 |
| 1.94E-12 | -0.66553 | 0.182 | 0.898 | 4.94E-08 | 2 CERS2      |
| 2.14E-12 | -1.99666 | 0.818 | 1     | 5.46E-08 | 2 DCN        |
| 2.32E-12 | -0.88539 | 0.727 | 0.985 | 5.91E-08 | 2 LEPROT     |
| 2.47E-12 | 1.16268  | 1     | 1     | 6.29E-08 | 2 UBE2O      |
| 2.51E-12 | -0.56964 | 0.424 | 0.905 | 6.39E-08 | 2 CAP1       |
| 2.54E-12 | 1.27627  | 1     | 1     | 6.47E-08 | 2 MYADML     |
| 2.73E-12 | -0.54304 | 0.212 | 0.949 | 6.94E-08 | 2 ATP6V0E1   |
| 2.82E-12 | -0.7381  | 0.667 | 0.964 | 7.19E-08 | 2 YIPF5      |
| 2.89E-12 | -1.45617 | 0.303 | 0.891 | 7.36E-08 | 2 CRISPLD1   |
| 2.90E-12 | -1.09558 | 0.424 | 1     | 7.40E-08 | 2 PDIA3      |
| 2.98E-12 | -0.54739 | 0.364 | 0.927 | 7.58E-08 | 2 ATP6AP1    |
| 3.32E-12 | -0.97953 | 0.394 | 1     | 8.46E-08 | 2 ANXA5      |
| 3.35E-12 | -0.96756 | 0.758 | 0.993 | 8.54E-08 | 2 ATL3       |
| 3.50E-12 | -0.74226 | 0.788 | 0.993 | 8.91E-08 | 2 YWHAB      |
| 3.55E-12 | -0.7214  | 0.758 | 1     | 9.04E-08 | 2 HADHB      |
| 3.70E-12 | -0.61047 | 0.606 | 0.964 | 9.44E-08 | 2 MAT2B      |
| 3.73E-12 | -0.71584 | 0.636 | 1     | 9.50E-08 | 2 EIF4G2     |
| 3.98E-12 | 0.638377 | 1     | 1     | 1.01E-07 | 2 LCMT2      |
| 4.13E-12 | -0.66396 | 0.485 | 0.934 | 1.05E-07 | 2 SIL1       |
| 4.13E-12 | -0.66313 | 0.576 | 0.993 | 1.05E-07 | 2 CSRP1      |
| 4.53E-12 | -0.65613 | 0.424 | 0.927 | 1.15E-07 | 2 BROX       |
| 4.68E-12 | -1.16097 | 0.758 | 0.993 | 1.19E-07 | 2 GPNMB      |
| 4.69E-12 | -0.70549 | 0.788 | 1     | 1.20E-07 | 2 STAT3      |
| 4.69E-12 | -0.98755 | 0.818 | 1     | 1.20E-07 | 2 ASPH       |
| 4.70E-12 | -0.6547  | 0.182 | 0.832 | 1.20E-07 | 2 GLO1       |
| 4.71E-12 | -0.62423 | 0.515 | 0.956 | 1.20E-07 | 2 EIF1AX     |
| 4.76E-12 | -0.82637 | 0.333 | 0.964 | 1.21E-07 | 2 RTN3       |

|          |          |       |       |          |              |
|----------|----------|-------|-------|----------|--------------|
| 5.13E-12 | -0.5184  | 0.303 | 0.905 | 1.31E-07 | 2 UFL1       |
| 5.24E-12 | -1.09783 | 0.758 | 1     | 1.33E-07 | 2 PAM        |
| 5.49E-12 | -0.99665 | 0.394 | 0.905 | 1.40E-07 | 2 SYPL1      |
| 5.61E-12 | -0.82011 | 0.364 | 0.964 | 1.43E-07 | 2 REEP5      |
| 5.87E-12 | -0.80207 | 0.424 | 0.964 | 1.50E-07 | 2 ANGPTL2    |
| 5.88E-12 | -0.87553 | 0.455 | 0.971 | 1.50E-07 | 2 MORF4L2    |
| 6.12E-12 | -0.97876 | 0.697 | 0.971 | 1.56E-07 | 2 STOM       |
| 6.31E-12 | -1.20016 | 0.636 | 0.993 | 1.61E-07 | 2 FBN1       |
| 6.35E-12 | -0.51145 | 0.152 | 0.825 | 1.62E-07 | 2 SLC39A1    |
| 6.46E-12 | -0.8434  | 0.455 | 0.934 | 1.65E-07 | 2 VCP        |
| 6.66E-12 | -0.65957 | 0.606 | 1     | 1.70E-07 | 2 NUCKS1     |
| 6.95E-12 | -1.05734 | 0.515 | 0.993 | 1.77E-07 | 2 ENO1       |
| 7.43E-12 | -1.09805 | 0.333 | 0.985 | 1.89E-07 | 2 PDIA6      |
| 7.48E-12 | -0.5297  | 0.545 | 0.971 | 1.90E-07 | 2 ARPC3      |
| 8.15E-12 | -0.57234 | 0.212 | 0.869 | 2.07E-07 | 2 PSMC2      |
| 8.35E-12 | -0.71204 | 0.515 | 0.978 | 2.13E-07 | 2 SELENOT    |
| 8.44E-12 | -0.6646  | 0.727 | 0.978 | 2.15E-07 | 2 SPTLC1     |
| 8.59E-12 | -0.71254 | 0.758 | 0.985 | 2.19E-07 | 2 EFNA5      |
| 8.74E-12 | -0.84176 | 0.848 | 0.993 | 2.23E-07 | 2 CTNNA1     |
| 8.75E-12 | -0.5514  | 0.576 | 1     | 2.23E-07 | 2 RAN        |
| 9.61E-12 | -1.02067 | 0.818 | 0.985 | 2.45E-07 | 2 RPN1       |
| 9.74E-12 | -0.56235 | 0.576 | 0.993 | 2.48E-07 | 2 TMEM230    |
| 1.01E-11 | -0.65389 | 0.394 | 0.905 | 2.57E-07 | 2 DERL1      |
| 1.01E-11 | -0.90136 | 0.667 | 1     | 2.57E-07 | 2 HLA-A      |
| 1.03E-11 | -0.53771 | 0.515 | 0.942 | 2.63E-07 | 2 TM9SF1     |
| 1.05E-11 | 0.554837 | 1     | 0.978 | 2.66E-07 | 2 AC008758.1 |
| 1.11E-11 | -0.57442 | 0.242 | 0.891 | 2.83E-07 | 2 TMED7      |
| 1.13E-11 | -0.86741 | 0.364 | 0.985 | 2.88E-07 | 2 CTSK       |
| 1.16E-11 | -0.8079  | 0.727 | 1     | 2.96E-07 | 2 EIF4A1     |
| 1.17E-11 | -0.566   | 0.364 | 0.978 | 2.98E-07 | 2 EIF4H      |
| 1.20E-11 | -0.87782 | 0.424 | 0.964 | 3.06E-07 | 2 LMAN1      |
| 1.23E-11 | 0.640255 | 1     | 0.993 | 3.14E-07 | 2 AL096700.1 |
| 1.25E-11 | -1.79957 | 0.697 | 0.964 | 3.17E-07 | 2 SPARCL1    |
| 1.27E-11 | -1.03388 | 0.939 | 1     | 3.22E-07 | 2 CLU        |
| 1.30E-11 | -0.61548 | 0.545 | 0.942 | 3.30E-07 | 2 SEC13      |
| 1.32E-11 | -0.53421 | 0.364 | 0.964 | 3.35E-07 | 2 YIPF3      |
| 1.33E-11 | -0.61751 | 0.273 | 0.949 | 3.38E-07 | 2 CRKL       |
| 1.39E-11 | -0.78261 | 0.455 | 0.934 | 3.55E-07 | 2 TFG        |
| 1.40E-11 | -0.52467 | 0.242 | 0.81  | 3.56E-07 | 2 NAA20      |
| 1.41E-11 | 0.562264 | 1     | 0.993 | 3.59E-07 | 2 ZNF836     |
| 1.44E-11 | -0.6212  | 0.424 | 1     | 3.67E-07 | 2 GABARAP    |
| 1.45E-11 | -0.75549 | 0.758 | 1     | 3.68E-07 | 2 APP        |
| 1.45E-11 | -0.79137 | 0.667 | 0.978 | 3.70E-07 | 2 ANXA7      |
| 1.46E-11 | -1.02086 | 0.333 | 0.912 | 3.71E-07 | 2 TSC22D3    |
| 1.48E-11 | -0.54088 | 0.364 | 0.949 | 3.76E-07 | 2 LMBRD1     |
| 1.48E-11 | -0.88311 | 0.485 | 0.912 | 3.77E-07 | 2 ARCN1      |
| 1.52E-11 | -0.51884 | 0.152 | 0.832 | 3.87E-07 | 2 LAMC1      |
| 1.55E-11 | -1.11416 | 0.576 | 1     | 3.95E-07 | 2 PRKAR1A    |
| 1.64E-11 | -0.95149 | 0.576 | 0.927 | 4.18E-07 | 2 FHL1       |
| 1.65E-11 | -0.79246 | 0.636 | 1     | 4.20E-07 | 2 PPIB       |
| 1.65E-11 | -0.78065 | 0.182 | 0.825 | 4.20E-07 | 2 HNRNPF     |
| 1.74E-11 | -0.60285 | 0.424 | 0.912 | 4.44E-07 | 2 NRBP1      |
| 1.80E-11 | -1.00128 | 1     | 1     | 4.59E-07 | 2 APLP2      |
| 1.85E-11 | 1.159662 | 1     | 1     | 4.71E-07 | 2 UPK3BL1    |
| 1.85E-11 | 0.79259  | 1     | 0.993 | 4.71E-07 | 2 PBLD       |
| 1.86E-11 | -0.71254 | 0.394 | 0.942 | 4.74E-07 | 2 TSPYL1     |
| 2.03E-11 | -1.58447 | 0.848 | 0.978 | 5.17E-07 | 2 SEMA3C     |
| 2.06E-11 | -0.69348 | 0.758 | 1     | 5.24E-07 | 2 EIF1       |

|          |          |       |       |          |   |            |
|----------|----------|-------|-------|----------|---|------------|
| 2.06E-11 | 0.765394 | 1     | 0.971 | 5.25E-07 | 2 | GTF3C5     |
| 2.06E-11 | 0.955054 | 1     | 1     | 5.25E-07 | 2 | TRIM41     |
| 2.14E-11 | -0.56019 | 0.152 | 0.796 | 5.45E-07 | 2 | GLB1       |
| 2.15E-11 | -0.77864 | 0.121 | 0.854 | 5.47E-07 | 2 | C1GALT1C1  |
| 2.16E-11 | -0.54552 | 0.515 | 0.978 | 5.51E-07 | 2 | AP2M1      |
| 2.17E-11 | -0.50328 | 0.758 | 0.985 | 5.52E-07 | 2 | SHISA5     |
| 2.17E-11 | -1.35809 | 0.455 | 0.942 | 5.54E-07 | 2 | SLC39A14   |
| 2.23E-11 | -0.70547 | 0.576 | 0.971 | 5.69E-07 | 2 | SCARB2     |
| 2.28E-11 | -0.81238 | 0.485 | 0.92  | 5.80E-07 | 2 | RAB18      |
| 2.29E-11 | -0.63442 | 0.121 | 0.869 | 5.84E-07 | 2 | YPEL5      |
| 2.30E-11 | -0.68694 | 1     | 1     | 5.85E-07 | 2 | DPYSL2     |
| 2.35E-11 | -0.65633 | 0.061 | 0.752 | 5.99E-07 | 2 | ARL2BP     |
| 2.36E-11 | -1.0204  | 1     | 1     | 6.01E-07 | 2 | ALDOA      |
| 2.45E-11 | -1.4679  | 0.303 | 0.876 | 6.24E-07 | 2 | MMP2       |
| 2.55E-11 | -0.92496 | 0.848 | 1     | 6.51E-07 | 2 | GSN        |
| 2.74E-11 | -1.38638 | 0.758 | 0.956 | 6.97E-07 | 2 | CAV1       |
| 2.77E-11 | -1.19877 | 0.909 | 1     | 7.06E-07 | 2 | LDHA       |
| 2.83E-11 | -0.81146 | 0.758 | 0.978 | 7.20E-07 | 2 | C2         |
| 3.08E-11 | -0.78922 | 0.576 | 0.934 | 7.84E-07 | 2 | GLT8D2     |
| 3.32E-11 | -0.6494  | 0.273 | 0.891 | 8.47E-07 | 2 | CAT        |
| 3.34E-11 | 0.692618 | 1     | 1     | 8.51E-07 | 2 | TRA2A      |
| 3.62E-11 | -0.57394 | 0.333 | 0.971 | 9.22E-07 | 2 | TOB1       |
| 3.65E-11 | -0.83666 | 0.273 | 0.847 | 9.31E-07 | 2 | SLC7A8     |
| 3.66E-11 | -0.62456 | 0.606 | 0.985 | 9.32E-07 | 2 | PPIC       |
| 3.68E-11 | -0.60182 | 0.394 | 0.891 | 9.38E-07 | 2 | DLX3       |
| 3.80E-11 | -0.75652 | 0.727 | 0.949 | 9.67E-07 | 2 | DEGS1      |
| 3.80E-11 | -0.78052 | 0.242 | 0.898 | 9.68E-07 | 2 | PGRMC1     |
| 3.82E-11 | 0.830981 | 1     | 1     | 9.72E-07 | 2 | SNRPD1     |
| 3.87E-11 | -1.05121 | 0.758 | 0.956 | 9.86E-07 | 2 | SCARA5     |
| 3.89E-11 | -0.63511 | 0.394 | 0.891 | 9.90E-07 | 2 | ANP32E     |
| 3.92E-11 | 0.754033 | 1     | 0.985 | 9.98E-07 | 2 | LANCL3     |
| 3.99E-11 | -0.7969  | 0.273 | 0.898 | 1.02E-06 | 2 | P4HA1      |
| 4.02E-11 | -0.947   | 0.848 | 1     | 1.02E-06 | 2 | ANXA1      |
| 4.12E-11 | -0.64446 | 0.424 | 1     | 1.05E-06 | 2 | SELENOF    |
| 4.13E-11 | 0.889867 | 1     | 1     | 1.05E-06 | 2 | AC090142.2 |
| 4.32E-11 | -0.82103 | 0.697 | 0.978 | 1.10E-06 | 2 | SQSTM1     |
| 4.35E-11 | -0.68776 | 0.727 | 1     | 1.11E-06 | 2 | HNRNPC     |
| 4.48E-11 | 0.62821  | 1     | 0.993 | 1.14E-06 | 2 | CCR4       |
| 4.60E-11 | -1.24472 | 0.939 | 1     | 1.17E-06 | 2 | VIM        |
| 4.84E-11 | -0.80751 | 0.424 | 0.912 | 1.23E-06 | 2 | PAPSS1     |
| 4.85E-11 | -0.63764 | 0.879 | 1     | 1.23E-06 | 2 | SKP1       |
| 4.95E-11 | -0.87882 | 0.485 | 0.876 | 1.26E-06 | 2 | TRAM1      |
| 5.02E-11 | -1.20566 | 0.515 | 0.869 | 1.28E-06 | 2 | COL4A1     |
| 5.11E-11 | 0.501304 | 1     | 1     | 1.30E-06 | 2 | ZNF527     |
| 5.67E-11 | -0.79049 | 0.818 | 0.993 | 1.44E-06 | 2 | NRP1       |
| 5.71E-11 | -0.72593 | 0.515 | 0.956 | 1.45E-06 | 2 | SBDS       |
| 5.99E-11 | -0.6184  | 0.879 | 1     | 1.52E-06 | 2 | EIF3E      |
| 6.02E-11 | -0.83547 | 0.667 | 0.956 | 1.53E-06 | 2 | PDCD4      |
| 6.30E-11 | -0.57809 | 0.303 | 0.927 | 1.60E-06 | 2 | TMX1       |
| 6.48E-11 | -0.73557 | 0.909 | 1     | 1.65E-06 | 2 | IQGAP1     |
| 6.81E-11 | 1.081144 | 0.97  | 0.942 | 1.73E-06 | 2 | USP28      |
| 6.82E-11 | -1.31422 | 0.818 | 0.993 | 1.74E-06 | 2 | THBS4      |
| 6.83E-11 | -0.51373 | 0.394 | 0.92  | 1.74E-06 | 2 | DERL2      |
| 7.39E-11 | -0.66162 | 0.939 | 1     | 1.88E-06 | 2 | PRCP       |
| 7.59E-11 | 0.633554 | 1     | 1     | 1.93E-06 | 2 | MT-ND2     |
| 7.78E-11 | -0.59391 | 0.364 | 0.934 | 1.98E-06 | 2 | EIF3D      |
| 7.99E-11 | -0.50511 | 0.545 | 0.942 | 2.03E-06 | 2 | ABHD2      |
| 8.21E-11 | 0.73813  | 1     | 1     | 2.09E-06 | 2 | ARL4C      |



|          |          |       |       |          |            |
|----------|----------|-------|-------|----------|------------|
| 8.29E-11 | -0.75609 | 0.485 | 0.942 | 2.11E-06 | 2 NDFIP2   |
| 8.36E-11 | -0.76641 | 0.424 | 0.978 | 2.13E-06 | 2 PLS3     |
| 8.39E-11 | -0.54616 | 0.485 | 0.985 | 2.14E-06 | 2 BTF3     |
| 9.01E-11 | -0.51846 | 0.424 | 0.949 | 2.29E-06 | 2 ENG      |
| 9.11E-11 | -0.58679 | 0.364 | 0.92  | 2.32E-06 | 2 ZFAND6   |
| 9.28E-11 | -0.59695 | 0.212 | 0.869 | 2.36E-06 | 2 ANGPTL1  |
| 9.28E-11 | -0.6913  | 0.485 | 0.927 | 2.36E-06 | 2 LHFPL6   |
| 9.31E-11 | -0.90212 | 0.697 | 1     | 2.37E-06 | 2 RHOA     |
| 9.85E-11 | -0.6448  | 0.848 | 1     | 2.51E-06 | 2 EIF3F    |
| 9.87E-11 | -0.63225 | 0.303 | 0.861 | 2.52E-06 | 2 SRPRB    |
| 9.90E-11 | -0.54873 | 0.485 | 0.949 | 2.52E-06 | 2 FKBP7    |
| 9.97E-11 | -0.50211 | 0.848 | 0.993 | 2.54E-06 | 2 SCPEP1   |
| 1.01E-10 | -1.33393 | 0.848 | 1     | 2.57E-06 | 2 COL6A3   |
| 1.02E-10 | -0.58694 | 0.667 | 0.971 | 2.61E-06 | 2 SMARCE1  |
| 1.02E-10 | 0.60286  | 0.97  | 0.978 | 2.61E-06 | 2 C12orf60 |
| 1.03E-10 | -0.64941 | 0.485 | 0.993 | 2.61E-06 | 2 MRFAP1   |
| 1.03E-10 | -0.62354 | 0.697 | 0.993 | 2.63E-06 | 2 VAPA     |
| 1.04E-10 | -0.54689 | 0.879 | 0.993 | 2.64E-06 | 2 EIF3C    |
| 1.06E-10 | -0.59606 | 0.818 | 1     | 2.71E-06 | 2 CYBRD1   |
| 1.07E-10 | -0.57021 | 0.879 | 1     | 2.71E-06 | 2 CPQ      |
| 1.11E-10 | -0.62847 | 0.515 | 0.971 | 2.83E-06 | 2 BNIP3L   |
| 1.12E-10 | -0.82386 | 0.848 | 1     | 2.86E-06 | 2 PPP1CB   |
| 1.20E-10 | -0.97491 | 0.788 | 0.993 | 3.04E-06 | 2 PLXDC2   |
| 1.24E-10 | -1.30064 | 0.879 | 0.993 | 3.17E-06 | 2 CFH      |
| 1.29E-10 | -0.79606 | 0.788 | 0.978 | 3.28E-06 | 2 CD44     |
| 1.31E-10 | -1.48414 | 0.545 | 0.905 | 3.33E-06 | 2 ACKR3    |
| 1.31E-10 | 0.641654 | 1     | 1     | 3.34E-06 | 2 ASAP1    |
| 1.35E-10 | -0.77348 | 0.545 | 0.964 | 3.44E-06 | 2 PTGES3   |
| 1.40E-10 | -0.59984 | 0.212 | 0.832 | 3.55E-06 | 2 RNASE4   |
| 1.49E-10 | -0.67603 | 0.848 | 0.985 | 3.80E-06 | 2 MOB1A    |
| 1.53E-10 | -0.61339 | 0.364 | 0.905 | 3.90E-06 | 2 SEL1L    |
| 1.59E-10 | -1.07138 | 0.333 | 0.869 | 4.04E-06 | 2 SLC2A12  |
| 1.65E-10 | 0.598127 | 1     | 1     | 4.21E-06 | 2 MT-CO3   |
| 1.74E-10 | -0.80111 | 0.818 | 1     | 4.43E-06 | 2 HLA-E    |
| 1.76E-10 | -0.5384  | 0.364 | 0.876 | 4.49E-06 | 2 ACTR2    |
| 1.80E-10 | -0.5952  | 0.485 | 0.978 | 4.58E-06 | 2 PAIP2    |
| 1.81E-10 | -0.6162  | 0.455 | 0.949 | 4.60E-06 | 2 PLPP3    |
| 1.84E-10 | -0.60217 | 0.364 | 0.934 | 4.68E-06 | 2 CYFIP1   |
| 1.88E-10 | -0.89471 | 0.576 | 0.934 | 4.79E-06 | 2 RERG     |
| 2.02E-10 | -0.54041 | 0.394 | 0.876 | 5.13E-06 | 2 GORASP2  |
| 2.03E-10 | -0.6593  | 0.879 | 1     | 5.18E-06 | 2 MORF4L1  |
| 2.03E-10 | -0.72244 | 0.515 | 0.985 | 5.18E-06 | 2 YWHAQ    |
| 2.08E-10 | -0.70843 | 0.788 | 1     | 5.30E-06 | 2 RPS3A    |
| 2.08E-10 | -0.53465 | 0.242 | 0.891 | 5.31E-06 | 2 GBP2     |
| 2.13E-10 | -0.86154 | 0.545 | 0.971 | 5.43E-06 | 2 SDCBP    |
| 2.14E-10 | 0.863192 | 1     | 1     | 5.45E-06 | 2 RPL7L1   |
| 2.22E-10 | -0.54629 | 0.545 | 0.956 | 5.66E-06 | 2 PCNP     |
| 2.24E-10 | -0.74882 | 0.818 | 0.964 | 5.70E-06 | 2 CAPZA1   |
| 2.25E-10 | 0.877931 | 1     | 0.985 | 5.74E-06 | 2 EPS15L1  |
| 2.28E-10 | -0.57435 | 0.727 | 0.956 | 5.80E-06 | 2 PTEN     |
| 2.35E-10 | -0.56686 | 0.303 | 0.978 | 5.98E-06 | 2 PGAM1    |
| 2.43E-10 | 0.542615 | 1     | 1     | 6.19E-06 | 2 RPP30    |
| 2.43E-10 | -0.7266  | 0.394 | 0.869 | 6.19E-06 | 2 ACSL4    |
| 2.47E-10 | -0.51895 | 0.394 | 0.927 | 6.29E-06 | 2 IER3IP1  |
| 2.52E-10 | -1.0292  | 0.576 | 0.985 | 6.41E-06 | 2 HSPA8    |
| 2.56E-10 | -0.68181 | 0.909 | 1     | 6.52E-06 | 2 TMED2    |
| 2.56E-10 | -0.82351 | 0.273 | 0.898 | 6.52E-06 | 2 ELOVL5   |
| 2.80E-10 | -0.70919 | 0.909 | 0.993 | 7.12E-06 | 2 SEC22B   |

|          |          |       |       |          |            |
|----------|----------|-------|-------|----------|------------|
| 2.89E-10 | -0.65603 | 0.758 | 0.985 | 7.37E-06 | 2 SLC30A9  |
| 2.97E-10 | -0.71791 | 0.758 | 1     | 7.58E-06 | 2 HMGN2    |
| 3.00E-10 | -0.60872 | 0.727 | 0.978 | 7.64E-06 | 2 MYADM    |
| 3.04E-10 | -0.81613 | 0.636 | 1     | 7.73E-06 | 2 RPL5     |
| 3.10E-10 | -0.50906 | 0.455 | 0.978 | 7.89E-06 | 2 PPP3CA   |
| 3.11E-10 | -0.76517 | 0.182 | 0.803 | 7.93E-06 | 2 ARMCX2   |
| 3.14E-10 | -0.78312 | 0.939 | 1     | 7.99E-06 | 2 COPB2    |
| 3.15E-10 | -0.74454 | 0.424 | 0.912 | 8.02E-06 | 2 GPC6     |
| 3.18E-10 | -0.63837 | 0.121 | 0.788 | 8.09E-06 | 2 SMIM15   |
| 3.21E-10 | -0.94073 | 0.758 | 1     | 8.18E-06 | 2 CD164    |
| 3.22E-10 | -0.85352 | 0.333 | 0.905 | 8.20E-06 | 2 NT5E     |
| 3.26E-10 | -0.69947 | 0.606 | 0.964 | 8.31E-06 | 2 NUDT21   |
| 3.30E-10 | -0.85126 | 0.939 | 0.985 | 8.40E-06 | 2 UGDH     |
| 3.31E-10 | -0.77925 | 0.424 | 0.891 | 8.43E-06 | 2 PLSCR4   |
| 3.39E-10 | -1.05939 | 0.394 | 0.934 | 8.63E-06 | 2 BGN      |
| 3.46E-10 | -0.60406 | 0.758 | 0.993 | 8.82E-06 | 2 TAPBP    |
| 3.47E-10 | -0.57901 | 0.879 | 1     | 8.84E-06 | 2 MYL6     |
| 3.47E-10 | -0.88815 | 0.909 | 1     | 8.84E-06 | 2 DAB2     |
| 3.49E-10 | -0.61953 | 0.606 | 0.971 | 8.89E-06 | 2 IFNAR1   |
| 3.54E-10 | -0.81946 | 0.697 | 0.993 | 9.02E-06 | 2 GAPDH    |
| 3.84E-10 | -0.50253 | 0.788 | 1     | 9.77E-06 | 2 SUMO2    |
| 3.89E-10 | -0.73385 | 0.545 | 1     | 9.90E-06 | 2 HSP90B1  |
| 4.14E-10 | -0.56002 | 0.818 | 1     | 1.05E-05 | 2 TMBIM4   |
| 4.32E-10 | -0.685   | 0.273 | 0.956 | 1.10E-05 | 2 PNRC2    |
| 4.34E-10 | -0.72304 | 0.182 | 0.81  | 1.10E-05 | 2 MAMDC2   |
| 4.41E-10 | -0.5543  | 0.485 | 0.942 | 1.12E-05 | 2 LIN7C    |
| 4.59E-10 | -0.62368 | 0.061 | 0.73  | 1.17E-05 | 2 PYURF    |
| 4.95E-10 | -0.80962 | 0.606 | 0.993 | 1.26E-05 | 2 FTH1     |
| 5.31E-10 | -0.77048 | 0.606 | 0.978 | 1.35E-05 | 2 ARF4     |
| 5.40E-10 | -0.79141 | 0.697 | 0.971 | 1.38E-05 | 2 UGP2     |
| 5.46E-10 | -0.75435 | 0.848 | 1     | 1.39E-05 | 2 CD47     |
| 5.49E-10 | -0.55986 | 0.606 | 0.971 | 1.40E-05 | 2 SELENBP1 |
| 5.49E-10 | -0.68246 | 0.667 | 0.993 | 1.40E-05 | 2 CALR     |
| 5.63E-10 | -0.74371 | 0.515 | 0.891 | 1.43E-05 | 2 ITFG1    |
| 5.79E-10 | -0.56868 | 0.636 | 0.927 | 1.47E-05 | 2 PSMA1    |
| 5.87E-10 | -0.74569 | 0.515 | 0.92  | 1.49E-05 | 2 PIGK     |
| 5.87E-10 | -0.60024 | 0.727 | 1     | 1.50E-05 | 2 DSTN     |
| 5.99E-10 | -0.77106 | 0.061 | 0.715 | 1.53E-05 | 2 RECQL    |
| 5.99E-10 | -0.92178 | 0.364 | 0.876 | 1.53E-05 | 2 HSD3B7   |
| 6.24E-10 | -0.77914 | 0.212 | 0.847 | 1.59E-05 | 2 PPT1     |
| 6.29E-10 | -0.55794 | 0.667 | 0.985 | 1.60E-05 | 2 ATXN10   |
| 6.36E-10 | -0.57199 | 0.242 | 0.825 | 1.62E-05 | 2 RPA1     |
| 7.07E-10 | -0.63674 | 0.515 | 0.956 | 1.80E-05 | 2 SH3GLB1  |
| 7.14E-10 | -0.63863 | 0.364 | 0.964 | 1.82E-05 | 2 RCN3     |
| 7.15E-10 | -0.59569 | 0.697 | 0.993 | 1.82E-05 | 2 GNS      |
| 7.21E-10 | -0.54841 | 0.455 | 0.92  | 1.84E-05 | 2 HRH1     |
| 7.72E-10 | -1.57337 | 0.788 | 0.985 | 1.97E-05 | 2 FOS      |
| 7.99E-10 | -1.59329 | 0.485 | 0.898 | 2.04E-05 | 2 GPR1     |
| 8.34E-10 | 0.607211 | 1     | 1     | 2.13E-05 | 2 DIP2A    |
| 8.55E-10 | 0.939993 | 1     | 1     | 2.18E-05 | 2 GPALPP1  |
| 8.77E-10 | 0.917186 | 1     | 1     | 2.23E-05 | 2 DCAF10   |
| 9.81E-10 | -0.5286  | 0.121 | 0.745 | 2.50E-05 | 2 GJA1     |
| 9.92E-10 | 0.656908 | 1     | 1     | 2.53E-05 | 2 TTC7B    |
| 1.03E-09 | -0.54142 | 0.182 | 0.774 | 2.62E-05 | 2 M6PR     |
| 1.12E-09 | -0.59994 | 0.576 | 0.956 | 2.84E-05 | 2 BCAP29   |
| 1.14E-09 | -0.73496 | 0.909 | 0.993 | 2.89E-05 | 2 CSNK1A1  |
| 1.18E-09 | -0.80768 | 0.848 | 1     | 3.00E-05 | 2 TMED10   |
| 1.20E-09 | -0.7317  | 0.545 | 0.993 | 3.07E-05 | 2 S100A10  |

|          |          |       |       |          |            |
|----------|----------|-------|-------|----------|------------|
| 1.21E-09 | -0.57896 | 0.727 | 0.964 | 3.08E-05 | 2 ACTR10   |
| 1.23E-09 | -0.60225 | 0.364 | 0.964 | 3.13E-05 | 2 TAGLN2   |
| 1.25E-09 | -0.60896 | 0.636 | 0.978 | 3.19E-05 | 2 TGOLN2   |
| 1.27E-09 | -0.69129 | 0.545 | 0.971 | 3.23E-05 | 2 PDPN     |
| 1.27E-09 | 0.876644 | 1     | 1     | 3.23E-05 | 2 ZNF84    |
| 1.36E-09 | -0.63109 | 0.455 | 0.912 | 3.46E-05 | 2 TMF1     |
| 1.39E-09 | -1.44639 | 0.333 | 0.898 | 3.54E-05 | 2 COL14A1  |
| 1.39E-09 | -0.58597 | 0.697 | 1     | 3.55E-05 | 2 COPA     |
| 1.47E-09 | -0.72319 | 0.364 | 0.956 | 3.74E-05 | 2 TPI1     |
| 1.51E-09 | -0.97093 | 0.333 | 0.891 | 3.84E-05 | 2 MFAP4    |
| 1.53E-09 | -0.50016 | 0.697 | 0.985 | 3.91E-05 | 2 DDX24    |
| 1.54E-09 | -0.55366 | 0.758 | 1     | 3.92E-05 | 2 LMNA     |
| 1.54E-09 | 0.535399 | 1     | 1     | 3.93E-05 | 2 MT-ATP6  |
| 1.60E-09 | -0.54246 | 0.697 | 0.956 | 4.07E-05 | 2 CCT5     |
| 1.61E-09 | -0.64974 | 0.061 | 0.679 | 4.11E-05 | 2 OSR2     |
| 1.65E-09 | -0.5727  | 0.333 | 0.839 | 4.20E-05 | 2 CMTM6    |
| 1.66E-09 | -0.50544 | 0.485 | 0.92  | 4.24E-05 | 2 RDX      |
| 1.68E-09 | -0.59648 | 0.636 | 0.971 | 4.27E-05 | 2 DAZAP2   |
| 1.70E-09 | -0.57095 | 0.576 | 0.964 | 4.33E-05 | 2 PRRX1    |
| 1.77E-09 | -0.50705 | 0.636 | 0.985 | 4.50E-05 | 2 TRAM2    |
| 1.78E-09 | -0.50169 | 0.333 | 0.912 | 4.54E-05 | 2 ATXN7L3B |
| 1.79E-09 | -0.56774 | 1     | 1     | 4.55E-05 | 2 PPIA     |
| 1.82E-09 | -0.55436 | 0.333 | 0.985 | 4.65E-05 | 2 EID1     |
| 1.83E-09 | -0.69767 | 0.97  | 1     | 4.66E-05 | 2 B2M      |
| 1.93E-09 | -1.21978 | 0.515 | 0.927 | 4.93E-05 | 2 TNFAIP6  |
| 1.94E-09 | -0.62838 | 0.636 | 0.971 | 4.94E-05 | 2 TVP23B   |
| 1.99E-09 | -0.53713 | 0.455 | 0.905 | 5.06E-05 | 2 PTGES    |
| 2.11E-09 | -0.51277 | 0.758 | 1     | 5.38E-05 | 2 MYL12A   |
| 2.15E-09 | -0.69729 | 0.606 | 0.964 | 5.47E-05 | 2 HERPUD1  |
| 2.15E-09 | -0.95386 | 0.636 | 0.993 | 5.48E-05 | 2 PDGFRA   |
| 2.33E-09 | -0.63194 | 0.424 | 0.942 | 5.94E-05 | 2 LAMB1    |
| 2.47E-09 | -0.7727  | 0.424 | 0.912 | 6.30E-05 | 2 SLC38A2  |
| 2.48E-09 | 0.506346 | 0.97  | 0.993 | 6.31E-05 | 2 POLR2D   |
| 2.51E-09 | -0.62691 | 0.909 | 1     | 6.39E-05 | 2 TMEM59   |
| 2.51E-09 | -0.7373  | 1     | 1     | 6.39E-05 | 2 ITM2B    |
| 2.62E-09 | -0.70279 | 0.121 | 0.701 | 6.67E-05 | 2 HSPA13   |
| 2.66E-09 | -0.82252 | 0.273 | 0.876 | 6.76E-05 | 2 DPT      |
| 2.68E-09 | -0.84587 | 0.697 | 0.985 | 6.82E-05 | 2 HSP90AB1 |
| 2.69E-09 | -0.51224 | 0.545 | 0.949 | 6.84E-05 | 2 HSD17B12 |
| 2.71E-09 | -0.60118 | 0.364 | 0.942 | 6.91E-05 | 2 SCP2     |
| 2.73E-09 | -0.58441 | 0.182 | 0.861 | 6.95E-05 | 2 TUBA1A   |
| 2.79E-09 | -1.12483 | 0.697 | 0.912 | 7.10E-05 | 2 FAM49A   |
| 2.86E-09 | -0.5082  | 0.848 | 0.978 | 7.28E-05 | 2 MRPL3    |
| 2.90E-09 | 0.547677 | 1     | 1     | 7.38E-05 | 2 SEC24D   |
| 3.05E-09 | -0.6449  | 0.485 | 0.956 | 7.77E-05 | 2 PTGDS    |
| 3.10E-09 | -0.68789 | 0.697 | 1     | 7.90E-05 | 2 RPS5     |
| 3.20E-09 | -0.56864 | 0.606 | 0.927 | 8.15E-05 | 2 RAB11A   |
| 3.43E-09 | -0.57251 | 0.273 | 0.825 | 8.73E-05 | 2 NAA50    |
| 3.48E-09 | -0.64586 | 0.455 | 0.949 | 8.86E-05 | 2 SRPRA    |
| 3.49E-09 | -0.72223 | 0.758 | 0.971 | 8.88E-05 | 2 ALDH3A2  |
| 3.50E-09 | -0.71649 | 0.818 | 0.971 | 8.91E-05 | 2 RO60     |
| 3.59E-09 | -0.66499 | 0.879 | 0.993 | 9.15E-05 | 2 ANXA4    |
| 3.59E-09 | -0.72521 | 0.909 | 1     | 9.16E-05 | 2 RPL15    |
| 3.61E-09 | -0.52446 | 0.455 | 0.964 | 9.19E-05 | 2 OSTC     |
| 3.69E-09 | -0.51206 | 0.727 | 0.964 | 9.40E-05 | 2 AKR1A1   |
| 4.00E-09 | -0.62648 | 0.212 | 0.788 | 0.000102 | 2 GOLT1B   |
| 4.02E-09 | -1.00476 | 0.697 | 0.978 | 0.000102 | 2 PLA2G2A  |
| 4.07E-09 | -0.54792 | 0.636 | 0.964 | 0.000104 | 2 HSPA9    |

|          |          |       |       |          |            |
|----------|----------|-------|-------|----------|------------|
| 4.10E-09 | -0.73409 | 0.394 | 0.891 | 0.000104 | 2 SEMA3E   |
| 4.24E-09 | -0.52997 | 0.758 | 0.993 | 0.000108 | 2 PDHB     |
| 4.47E-09 | -0.64351 | 0.455 | 1     | 0.000114 | 2 CD63     |
| 4.63E-09 | -0.7052  | 0.545 | 0.978 | 0.000118 | 2 ATP5F1B  |
| 4.77E-09 | -0.61637 | 0.152 | 0.73  | 0.000121 | 2 ATP1B3   |
| 5.17E-09 | -0.527   | 0.636 | 0.964 | 0.000132 | 2 UBAC2    |
| 5.21E-09 | -0.99642 | 0.636 | 0.934 | 0.000133 | 2 FAP      |
| 5.60E-09 | -0.59658 | 0.636 | 0.993 | 0.000143 | 2 SRP9     |
| 5.64E-09 | -0.5734  | 0.697 | 0.934 | 0.000144 | 2 SNX6     |
| 6.03E-09 | -0.50669 | 0.121 | 0.708 | 0.000154 | 2 ABHD10   |
| 6.06E-09 | -0.62092 | 0.515 | 0.92  | 0.000154 | 2 FBXL5    |
| 6.28E-09 | -0.73985 | 0.515 | 0.861 | 0.00016  | 2 ZMPSTE24 |
| 6.56E-09 | -0.58276 | 0.303 | 0.861 | 0.000167 | 2 IFNGR1   |
| 6.70E-09 | -0.55168 | 0.424 | 0.861 | 0.000171 | 2 TBPL1    |
| 6.73E-09 | -0.67404 | 0.667 | 0.971 | 0.000172 | 2 P4HA2    |
| 7.10E-09 | -0.62485 | 0.697 | 0.985 | 0.000181 | 2 NOTCH2   |
| 7.59E-09 | -0.52889 | 0.242 | 0.796 | 0.000193 | 2 SUCLA2   |
| 7.81E-09 | -0.56078 | 0.758 | 0.978 | 0.000199 | 2 EXT2     |
| 7.84E-09 | -0.53468 | 0.818 | 1     | 0.0002   | 2 SPCS2    |
| 8.39E-09 | -0.51943 | 0.758 | 0.993 | 0.000214 | 2 HADHA    |
| 8.66E-09 | -0.54504 | 0.424 | 0.934 | 0.000221 | 2 COPB1    |
| 9.02E-09 | 0.585492 | 1     | 1     | 0.00023  | 2 MT-CYB   |
| 9.33E-09 | -0.59618 | 0.909 | 0.978 | 0.000238 | 2 FTO      |
| 9.34E-09 | -0.60321 | 0.667 | 0.971 | 0.000238 | 2 MBTPS1   |
| 9.36E-09 | -0.90341 | 0.697 | 0.971 | 0.000238 | 2 TNXB     |
| 1.04E-08 | -0.59946 | 0.424 | 0.847 | 0.000264 | 2 THBS3    |
| 1.07E-08 | -0.51772 | 0.061 | 0.679 | 0.000272 | 2 TWF1     |
| 1.07E-08 | -0.92617 | 0.303 | 0.745 | 0.000273 | 2 OLFML2B  |
| 1.12E-08 | -0.82713 | 0.636 | 0.971 | 0.000286 | 2 CALU     |
| 1.14E-08 | -0.60236 | 0.758 | 0.993 | 0.000289 | 2 NFIA     |
| 1.16E-08 | -0.60456 | 0.697 | 1     | 0.000296 | 2 RBPJ     |
| 1.17E-08 | -0.56534 | 0.576 | 0.934 | 0.000298 | 2 SGCB     |
| 1.18E-08 | -0.73243 | 0.697 | 0.956 | 0.000299 | 2 TMEM263  |
| 1.18E-08 | -0.50629 | 0.424 | 0.876 | 0.000301 | 2 CAMK2D   |
| 1.20E-08 | -0.51471 | 0.152 | 0.759 | 0.000305 | 2 TSC22D1  |
| 1.22E-08 | 0.526687 | 1     | 1     | 0.000311 | 2 DIS3L    |
| 1.25E-08 | -0.5124  | 0.758 | 0.993 | 0.000317 | 2 ARL1     |
| 1.25E-08 | -0.59711 | 0.606 | 0.956 | 0.000318 | 2 GDI2     |
| 1.28E-08 | -0.5951  | 0.515 | 0.883 | 0.000327 | 2 TM2D2    |
| 1.30E-08 | -0.65123 | 0.818 | 0.985 | 0.000332 | 2 HEXA     |
| 1.31E-08 | -0.54419 | 0.515 | 0.898 | 0.000333 | 2 ANPEP    |
| 1.34E-08 | -0.64973 | 0.424 | 0.942 | 0.000342 | 2 TMEM30A  |
| 1.36E-08 | -0.51426 | 0.424 | 0.898 | 0.000346 | 2 GLT8D1   |
| 1.48E-08 | -0.68349 | 0.394 | 0.861 | 0.000376 | 2 CASP3    |
| 1.61E-08 | -0.58836 | 0.545 | 0.912 | 0.000411 | 2 ARFGAP3  |
| 1.64E-08 | -0.54543 | 0.879 | 0.956 | 0.000418 | 2 USP11    |
| 1.66E-08 | -0.70485 | 0.697 | 0.964 | 0.000424 | 2 ARID5B   |
| 1.70E-08 | -0.53075 | 0.545 | 1     | 0.000434 | 2 ITGB1    |
| 1.71E-08 | -0.50885 | 0.424 | 0.956 | 0.000436 | 2 MAPRE2   |
| 1.75E-08 | -0.55864 | 0.576 | 0.956 | 0.000447 | 2 CD82     |
| 1.77E-08 | -0.5425  | 0.303 | 0.876 | 0.00045  | 2 KDELR3   |
| 1.91E-08 | -0.92434 | 0.152 | 0.708 | 0.000487 | 2 ENPP2    |
| 1.93E-08 | -1.11557 | 0.848 | 0.971 | 0.00049  | 2 SERPINF1 |
| 2.00E-08 | -0.56376 | 0.576 | 0.993 | 0.000509 | 2 PTMA     |
| 2.10E-08 | -0.74737 | 0.455 | 0.861 | 0.000534 | 2 BHLHE40  |
| 2.10E-08 | -0.58344 | 0.242 | 0.81  | 0.000534 | 2 HSPA1A   |
| 2.11E-08 | -0.62412 | 0.909 | 1     | 0.000538 | 2 TPT1     |
| 2.12E-08 | -0.53473 | 0.545 | 0.912 | 0.00054  | 2 RDH11    |

|          |          |       |       |          |              |
|----------|----------|-------|-------|----------|--------------|
| 2.14E-08 | -0.75061 | 0.485 | 0.912 | 0.000544 | 2 SDC2       |
| 2.18E-08 | -0.71643 | 0.697 | 0.949 | 0.000554 | 2 ERAP2      |
| 2.19E-08 | -0.50784 | 0.636 | 0.985 | 0.000558 | 2 SPCS3      |
| 2.33E-08 | -0.56239 | 0.727 | 0.942 | 0.000594 | 2 ADGRE5     |
| 2.42E-08 | 0.648133 | 0.939 | 0.956 | 0.000616 | 2 AP002981.1 |
| 2.53E-08 | -0.65688 | 0.758 | 1     | 0.000644 | 2 RPL6       |
| 2.80E-08 | -0.57026 | 0.242 | 0.818 | 0.000714 | 2 DLD        |
| 2.84E-08 | -0.51633 | 0.939 | 1     | 0.000723 | 2 RACK1      |
| 2.88E-08 | -0.77045 | 0.485 | 0.847 | 0.000733 | 2 COL12A1    |
| 2.93E-08 | -0.53734 | 0.909 | 0.993 | 0.000747 | 2 HDLBP      |
| 2.96E-08 | -0.60772 | 0.485 | 0.876 | 0.000754 | 2 COQ10B     |
| 2.97E-08 | -0.78757 | 0.879 | 1     | 0.000756 | 2 EBF1       |
| 3.06E-08 | -0.51676 | 0.727 | 0.993 | 0.000779 | 2 EEF2       |
| 3.23E-08 | -0.58957 | 0.424 | 0.869 | 0.000823 | 2 GLIPR1     |
| 3.26E-08 | -0.54891 | 0.515 | 0.985 | 0.00083  | 2 MAGED2     |
| 3.39E-08 | -0.54689 | 0.364 | 0.825 | 0.000864 | 2 TMOD1      |
| 3.54E-08 | -0.60393 | 0.364 | 0.898 | 0.000902 | 2 EPHA3      |
| 3.73E-08 | -0.62975 | 0.636 | 0.956 | 0.00095  | 2 TMEM167A   |
| 3.86E-08 | 0.672942 | 0.909 | 0.869 | 0.000982 | 2 SPINT2     |
| 3.86E-08 | -0.65501 | 0.758 | 0.971 | 0.000984 | 2 BCLAF1     |
| 3.99E-08 | -0.867   | 0.606 | 0.898 | 0.001016 | 2 SLC29A1    |
| 4.03E-08 | -1.25807 | 0.758 | 0.956 | 0.001026 | 2 HTRA1      |
| 4.15E-08 | -1.22787 | 0.909 | 1     | 0.001058 | 2 CD55       |
| 4.22E-08 | -0.73244 | 0.727 | 0.971 | 0.001074 | 2 FGF10      |
| 4.34E-08 | -0.58717 | 0.879 | 1     | 0.001106 | 2 RPLP0      |
| 4.41E-08 | -0.66509 | 0.697 | 0.978 | 0.001123 | 2 ERLEC1     |
| 4.42E-08 | -0.51025 | 0.545 | 0.927 | 0.001126 | 2 STAG2      |
| 4.84E-08 | -0.76198 | 0.818 | 0.985 | 0.001234 | 2 ACTR3      |
| 4.88E-08 | -0.51134 | 0.576 | 0.934 | 0.001244 | 2 DYM        |
| 5.04E-08 | -0.56515 | 0.606 | 1     | 0.001283 | 2 RPSA       |
| 5.30E-08 | -0.58166 | 0.818 | 0.993 | 0.001349 | 2 RPL13      |
| 5.42E-08 | -0.66201 | 0.939 | 1     | 0.001381 | 2 STEAP4     |
| 5.54E-08 | -0.59215 | 0.848 | 1     | 0.001411 | 2 TOR1AIP1   |
| 5.54E-08 | -0.51538 | 0.939 | 0.993 | 0.001411 | 2 CALM1      |
| 5.58E-08 | -0.87401 | 0.818 | 0.92  | 0.001421 | 2 TMEM196    |
| 5.86E-08 | -0.60338 | 0.697 | 0.964 | 0.001492 | 2 OSMR       |
| 5.90E-08 | -0.73702 | 0.758 | 0.985 | 0.001503 | 2 DDX3X      |
| 6.44E-08 | -0.55584 | 0.697 | 0.993 | 0.00164  | 2 FTL        |
| 6.47E-08 | 0.93344  | 1     | 1     | 0.001647 | 2 OPA3       |
| 6.65E-08 | -0.63665 | 0.636 | 0.891 | 0.001693 | 2 MRPS10     |
| 6.68E-08 | -0.55253 | 0.909 | 0.993 | 0.001702 | 2 TPD52L1    |
| 6.97E-08 | -0.57073 | 0.697 | 0.956 | 0.001776 | 2 GULP1      |
| 7.22E-08 | 0.584098 | 1     | 1     | 0.001838 | 2 MT-ND5     |
| 7.22E-08 | -0.52312 | 0.424 | 0.891 | 0.001839 | 2 PCOLCE2    |
| 7.68E-08 | -0.54246 | 0.697 | 1     | 0.001957 | 2 RPL10A     |
| 7.78E-08 | -0.56357 | 0.848 | 0.993 | 0.001983 | 2 ZFP36L1    |
| 7.80E-08 | -0.56682 | 0.152 | 0.693 | 0.001986 | 2 ENPP4      |
| 8.32E-08 | -0.50998 | 0.909 | 0.993 | 0.002118 | 2 SMIM14     |
| 8.41E-08 | -0.56615 | 0.97  | 1     | 0.002142 | 2 GNAI3      |
| 9.01E-08 | -0.62132 | 0.455 | 0.81  | 0.002296 | 2 MOB4       |
| 9.47E-08 | -0.52948 | 0.848 | 0.993 | 0.002412 | 2 YME1L1     |
| 1.03E-07 | -0.59472 | 0.485 | 0.818 | 0.00262  | 2 MTMR2      |
| 1.17E-07 | -0.55122 | 0.242 | 0.715 | 0.002974 | 2 UBL3       |
| 1.18E-07 | -0.86542 | 0.788 | 0.971 | 0.003018 | 2 ENPP1      |
| 1.19E-07 | 0.501317 | 1     | 1     | 0.00303  | 2 COG7       |
| 1.23E-07 | -0.60311 | 0.636 | 0.978 | 0.003132 | 2 SCARA3     |
| 1.27E-07 | -0.65533 | 0.879 | 1     | 0.003231 | 2 FNDC3B     |
| 1.33E-07 | -0.69073 | 0.455 | 0.891 | 0.003381 | 2 GALNT5     |

|          |          |       |       |          |              |
|----------|----------|-------|-------|----------|--------------|
| 1.36E-07 | -0.59588 | 0.152 | 0.642 | 0.003473 | 2 CDO1       |
| 1.39E-07 | -0.64932 | 0.212 | 0.715 | 0.00353  | 2 BICC1      |
| 1.47E-07 | -0.54767 | 1     | 1     | 0.003756 | 2 CAPZA2     |
| 1.51E-07 | -0.58999 | 0.879 | 1     | 0.003836 | 2 SEC31A     |
| 1.66E-07 | -0.73636 | 0.121 | 0.635 | 0.004233 | 2 MXRA5      |
| 1.67E-07 | -0.67724 | 0.758 | 0.978 | 0.004253 | 2 SULF1      |
| 1.73E-07 | -0.73114 | 0.97  | 0.993 | 0.004408 | 2 CLTC       |
| 1.85E-07 | -0.88183 | 0.636 | 0.934 | 0.004724 | 2 ARRDC3     |
| 1.89E-07 | -0.57577 | 0.273 | 0.723 | 0.004803 | 2 CASP7      |
| 1.90E-07 | -0.59625 | 0.636 | 0.942 | 0.004843 | 2 ZNF385B    |
| 1.91E-07 | -0.73423 | 0.333 | 0.796 | 0.004859 | 2 TSPAN7     |
| 2.03E-07 | -0.58277 | 0.333 | 0.803 | 0.005183 | 2 TPPP3      |
| 2.22E-07 | -0.51769 | 0.667 | 0.993 | 0.005658 | 2 RPS4X      |
| 2.35E-07 | -0.92698 | 0.879 | 0.993 | 0.005992 | 2 PRSS23     |
| 2.42E-07 | -0.50178 | 0.121 | 0.606 | 0.006171 | 2 MFSD14A    |
| 2.56E-07 | -0.61002 | 0.121 | 0.613 | 0.00651  | 2 KLF10      |
| 2.56E-07 | -0.52903 | 0.576 | 0.898 | 0.006531 | 2 SERPINB1   |
| 2.57E-07 | -0.57827 | 0.212 | 0.708 | 0.006543 | 2 AQP1       |
| 2.84E-07 | -0.63446 | 0.909 | 0.971 | 0.007234 | 2 SEC23A     |
| 3.00E-07 | -0.58196 | 0.545 | 1     | 0.007639 | 2 EEF1G      |
| 3.04E-07 | -0.79795 | 0.848 | 0.949 | 0.007754 | 2 GFPT2      |
| 3.29E-07 | -0.53453 | 0.818 | 1     | 0.008377 | 2 RPL10      |
| 3.35E-07 | -0.50228 | 0.697 | 0.993 | 0.008527 | 2 RPL7       |
| 3.36E-07 | 0.510442 | 1     | 1     | 0.008558 | 2 MTRNR2L12  |
| 3.48E-07 | -0.60205 | 0.727 | 0.971 | 0.008868 | 2 HBP1       |
| 3.50E-07 | 0.509306 | 1     | 0.993 | 0.008922 | 2 HELLS      |
| 3.60E-07 | -0.61464 | 0.727 | 0.942 | 0.009177 | 2 PJA2       |
| 4.19E-07 | -0.51638 | 0.273 | 0.701 | 0.010661 | 2 DHX40      |
| 4.31E-07 | 0.799275 | 0.939 | 0.978 | 0.010972 | 2 GEMIN6     |
| 4.41E-07 | -0.6306  | 0.545 | 0.883 | 0.01123  | 2 EZR        |
| 5.34E-07 | -0.52255 | 0.545 | 0.942 | 0.0136   | 2 DNAJA1     |
| 5.39E-07 | -0.52407 | 0.758 | 0.985 | 0.013725 | 2 CD68       |
| 6.02E-07 | -0.56152 | 0.515 | 0.832 | 0.015346 | 2 DARS       |
| 6.82E-07 | -0.99045 | 0.758 | 0.891 | 0.017376 | 2 CRTAC1     |
| 8.30E-07 | -0.60719 | 0.545 | 0.949 | 0.021147 | 2 ANGPTL4    |
| 8.31E-07 | -0.52517 | 0.455 | 0.927 | 0.021172 | 2 IFI16      |
| 8.83E-07 | -0.69278 | 0.152 | 0.657 | 0.022503 | 2 LRRC15     |
| 8.97E-07 | -0.95117 | 0.758 | 0.912 | 0.022846 | 2 UAP1       |
| 9.34E-07 | -0.65249 | 0.636 | 0.942 | 0.023784 | 2 ITGAV      |
| 9.61E-07 | -0.61488 | 0.788 | 0.993 | 0.024485 | 2 LAMA4      |
| 9.66E-07 | -0.561   | 0.091 | 0.555 | 0.02461  | 2 PLPP1      |
| 9.69E-07 | -0.50238 | 0.758 | 0.978 | 0.02468  | 2 JKAMP      |
| 1.00E-06 | -0.52106 | 0.455 | 0.861 | 0.025563 | 2 CFD        |
| 1.01E-06 | -0.53225 | 0.333 | 0.781 | 0.025837 | 2 TWSG1      |
| 1.04E-06 | -0.59105 | 0.848 | 0.978 | 0.026526 | 2 SLC30A7    |
| 1.05E-06 | -0.58119 | 0.667 | 0.985 | 0.026679 | 2 MT2A       |
| 1.10E-06 | -0.65223 | 0.909 | 0.985 | 0.027911 | 2 LIMA1      |
| 1.58E-06 | -0.55004 | 0.303 | 0.701 | 0.040325 | 2 LIPA       |
| 1.58E-06 | -0.52934 | 0.727 | 0.956 | 0.040347 | 2 SASH1      |
| 1.73E-06 | -0.67022 | 0.727 | 0.964 | 0.044144 | 2 CSGALNACT1 |
| 4.16E-32 | 1.13911  | 0.96  | 0.028 | 1.06E-27 | 3 OLFML3     |
| 1.81E-15 | 1.290405 | 1     | 0.303 | 4.62E-11 | 3 PCDH18     |
| 3.39E-15 | 3.01144  | 1     | 0.972 | 8.62E-11 | 3 VCAN       |
| 1.09E-14 | 1.97481  | 1     | 0.724 | 2.78E-10 | 3 MMP2       |
| 1.32E-14 | 2.496513 | 1     | 0.959 | 3.35E-10 | 3 DCN        |
| 1.67E-14 | 1.495739 | 1     | 0.841 | 4.25E-10 | 3 SELENOP    |
| 2.83E-14 | 1.755221 | 0.96  | 0.421 | 7.22E-10 | 3 FGF7       |
| 6.94E-14 | 0.944435 | 0.52  | 0.034 | 1.77E-09 | 3 SRPX       |

|          |          |      |       |          |            |
|----------|----------|------|-------|----------|------------|
| 1.32E-13 | 2.499038 | 1    | 0.648 | 3.36E-09 | 3 CXCL12   |
| 1.44E-13 | 1.286527 | 0.92 | 0.386 | 3.67E-09 | 3 PLPP1    |
| 2.00E-13 | -1.64556 | 0.08 | 0.924 | 5.10E-09 | 3 CLIC5    |
| 3.33E-13 | 1.276719 | 1    | 0.89  | 8.48E-09 | 3 LUM      |
| 1.39E-12 | 1.539144 | 1    | 0.745 | 3.54E-08 | 3 MFAP4    |
| 1.44E-12 | 0.774874 | 0.92 | 0.434 | 3.67E-08 | 3 SETBP1   |
| 1.54E-12 | -1.78353 | 0.96 | 1     | 3.93E-08 | 3 ITGB8    |
| 1.56E-12 | 1.411454 | 1    | 0.807 | 3.98E-08 | 3 IGFBP4   |
| 2.05E-12 | -2.00481 | 0.4  | 0.945 | 5.23E-08 | 3 CRTAC1   |
| 2.21E-12 | 1.070453 | 1    | 0.807 | 5.64E-08 | 3 SERPING1 |
| 2.51E-12 | 1.713827 | 1    | 0.752 | 6.40E-08 | 3 COL14A1  |
| 3.57E-12 | 1.332166 | 1    | 0.91  | 9.09E-08 | 3 PDGFRA   |
| 8.57E-12 | 0.983663 | 1    | 0.959 | 2.18E-07 | 3 ZFP36L1  |
| 8.91E-12 | 1.260744 | 1    | 0.593 | 2.27E-07 | 3 ECM2     |
| 1.09E-11 | -1.49639 | 0.44 | 0.966 | 2.78E-07 | 3 ERFFI1   |
| 1.24E-11 | -1.29625 | 0.52 | 0.959 | 3.16E-07 | 3 GABRA4   |
| 2.40E-11 | 1.251042 | 0.64 | 0.124 | 6.11E-07 | 3 SFRP1    |
| 3.43E-11 | 1.041823 | 0.8  | 0.317 | 8.75E-07 | 3 FBLN5    |
| 3.57E-11 | 0.886721 | 1    | 0.724 | 9.09E-07 | 3 KCTD12   |
| 5.26E-11 | 0.695569 | 0.48 | 0.048 | 1.34E-06 | 3 MEST     |
| 7.00E-11 | 1.314488 | 0.92 | 0.566 | 1.78E-06 | 3 BICC1    |
| 8.71E-11 | 1.217964 | 0.84 | 0.255 | 2.22E-06 | 3 OGN      |
| 1.59E-10 | 0.646402 | 0.64 | 0.138 | 4.05E-06 | 3 THY1     |
| 2.42E-10 | 1.093561 | 0.96 | 0.462 | 6.17E-06 | 3 MXRA5    |
| 3.14E-10 | 1.18025  | 1    | 0.972 | 7.99E-06 | 3 C1S      |
| 3.23E-10 | 0.870573 | 1    | 0.869 | 8.22E-06 | 3 BOC      |
| 3.92E-10 | 1.773861 | 0.96 | 0.593 | 9.99E-06 | 3 CP       |
| 4.70E-10 | 0.813608 | 0.64 | 0.145 | 1.20E-05 | 3 RSPO2    |
| 4.94E-10 | -1.34106 | 0.72 | 0.952 | 1.26E-05 | 3 SEMA5A   |
| 6.10E-10 | 1.039674 | 1    | 0.903 | 1.55E-05 | 3 STOM     |
| 6.10E-10 | -1.92303 | 0.76 | 0.945 | 1.55E-05 | 3 HTRA1    |
| 8.22E-10 | -1.30251 | 0.8  | 0.966 | 2.09E-05 | 3 ITGBL1   |
| 8.81E-10 | 0.902532 | 0.96 | 0.759 | 2.24E-05 | 3 AHR      |
| 9.09E-10 | -1.6361  | 1    | 0.993 | 2.32E-05 | 3 BCAT1    |
| 1.04E-09 | -2.70476 | 1    | 1     | 2.66E-05 | 3 PRG4     |
| 1.12E-09 | -1.12682 | 0.88 | 0.993 | 2.85E-05 | 3 PDLIM5   |
| 1.76E-09 | -1.3498  | 0.28 | 0.821 | 4.48E-05 | 3 HBEGF    |
| 1.79E-09 | -1.02733 | 0.84 | 0.945 | 4.56E-05 | 3 ANK3     |
| 2.06E-09 | 0.69016  | 0.8  | 0.4   | 5.25E-05 | 3 PODN     |
| 2.24E-09 | 1.426326 | 1    | 0.966 | 5.70E-05 | 3 CFH      |
| 2.76E-09 | 2.026366 | 0.96 | 0.8   | 7.04E-05 | 3 IGF1     |
| 2.93E-09 | 1.084804 | 0.96 | 0.752 | 7.47E-05 | 3 CNN3     |
| 3.64E-09 | 0.76165  | 0.92 | 0.586 | 9.27E-05 | 3 DIO2     |
| 4.09E-09 | 0.739374 | 0.8  | 0.297 | 0.000104 | 3 SPOCK1   |
| 4.21E-09 | 0.707326 | 0.76 | 0.303 | 0.000107 | 3 PDLIM1   |
| 4.48E-09 | 1.207629 | 0.92 | 0.724 | 0.000114 | 3 FBLN1    |
| 4.63E-09 | -1.07417 | 0.2  | 0.841 | 0.000118 | 3 NTN4     |
| 4.69E-09 | 1.201163 | 0.96 | 0.724 | 0.000119 | 3 DPT      |
| 4.78E-09 | -1.08639 | 0.76 | 0.924 | 0.000122 | 3 DNASE1L3 |
| 4.81E-09 | 1.130865 | 0.6  | 0.138 | 0.000123 | 3 NID1     |
| 6.73E-09 | 0.528285 | 0.4  | 0.041 | 0.000171 | 3 SCG2     |
| 7.17E-09 | 2.017417 | 0.88 | 0.738 | 0.000183 | 3 C4B      |
| 7.44E-09 | -1.15411 | 0.2  | 0.793 | 0.00019  | 3 TSPAN7   |
| 7.55E-09 | -1.11278 | 0.36 | 0.876 | 0.000192 | 3 COL4A1   |
| 7.76E-09 | 0.613378 | 0.88 | 0.379 | 0.000198 | 3 CD74     |
| 9.99E-09 | -1.12163 | 0.36 | 0.834 | 0.000255 | 3 SLC2A12  |
| 1.03E-08 | -0.82457 | 0.84 | 0.945 | 0.000263 | 3 SOX5     |
| 1.14E-08 | -0.74504 | 0.48 | 0.924 | 0.000291 | 3 FGF14    |

|          |          |      |       |          |            |
|----------|----------|------|-------|----------|------------|
| 1.30E-08 | 1.157242 | 0.88 | 0.6   | 0.000332 | 3 NID2     |
| 1.61E-08 | 2.246972 | 0.84 | 0.441 | 0.000411 | 3 C7       |
| 2.16E-08 | 2.489528 | 0.96 | 0.869 | 0.000549 | 3 C3       |
| 2.52E-08 | -2.0221  | 0.8  | 0.931 | 0.000641 | 3 SPARCL1  |
| 2.68E-08 | -2.01532 | 1    | 1     | 0.000682 | 3 FN1      |
| 2.78E-08 | 0.520459 | 0.8  | 0.379 | 0.000709 | 3 GRIK3    |
| 2.96E-08 | 0.995872 | 0.92 | 0.841 | 0.000754 | 3 PLPP3    |
| 3.17E-08 | -0.62304 | 0.36 | 0.834 | 0.000808 | 3 DAPK1    |
| 3.19E-08 | 1.53778  | 0.88 | 0.703 | 0.000813 | 3 C4A      |
| 3.41E-08 | -0.54219 | 0.64 | 0.869 | 0.00087  | 3 MINDY2   |
| 3.54E-08 | 1.184793 | 0.96 | 0.793 | 0.000903 | 3 CDH11    |
| 3.59E-08 | 1.549136 | 0.84 | 0.414 | 0.000914 | 3 PTGFR    |
| 3.78E-08 | -1.61977 | 0.16 | 0.724 | 0.000963 | 3 PARM1    |
| 4.13E-08 | -0.62226 | 0.12 | 0.71  | 0.001051 | 3 COL22A1  |
| 4.36E-08 | -0.81784 | 0.72 | 0.91  | 0.00111  | 3 ZNF385B  |
| 4.49E-08 | 1.144077 | 0.88 | 0.497 | 0.001143 | 3 PLAU     |
| 5.11E-08 | 0.57101  | 1    | 0.931 | 0.001301 | 3 CCN5     |
| 5.19E-08 | 1.002623 | 0.76 | 0.262 | 0.001322 | 3 KITLG    |
| 5.39E-08 | 0.689581 | 0.96 | 0.593 | 0.001372 | 3 PDGFRB   |
| 5.64E-08 | 0.511703 | 0.52 | 0.117 | 0.001436 | 3 PTGFRN   |
| 5.86E-08 | -4.04478 | 0.52 | 0.855 | 0.001494 | 3 MMP3     |
| 6.04E-08 | -1.44122 | 0.76 | 0.945 | 0.001537 | 3 SEMA3A   |
| 6.23E-08 | -0.74218 | 1    | 0.959 | 0.001588 | 3 SORBS2   |
| 6.55E-08 | -0.55474 | 0.44 | 0.821 | 0.001668 | 3 NDUFA4L2 |
| 6.95E-08 | 1.045904 | 0.92 | 0.579 | 0.001771 | 3 GLUL     |
| 7.08E-08 | -1.17025 | 0.56 | 0.924 | 0.001804 | 3 FAM49A   |
| 9.33E-08 | -0.76897 | 0.96 | 0.966 | 0.002376 | 3 PCSK6    |
| 9.93E-08 | -0.50665 | 0.12 | 0.697 | 0.002529 | 3 MTUS2    |
| 1.09E-07 | -0.90881 | 0.76 | 0.903 | 0.002784 | 3 ITGAV    |
| 1.17E-07 | 1.089627 | 1    | 0.938 | 0.002985 | 3 FOS      |
| 1.52E-07 | -1.05313 | 0.52 | 0.876 | 0.003869 | 3 FOXO1    |
| 1.52E-07 | -1.92618 | 0.48 | 0.841 | 0.003878 | 3 TWISTNB  |
| 1.59E-07 | -0.85101 | 0.76 | 0.945 | 0.004053 | 3 PSD3     |
| 1.64E-07 | -1.36    | 0.96 | 0.959 | 0.004179 | 3 THBS4    |
| 1.90E-07 | 0.730452 | 0.88 | 0.455 | 0.004836 | 3 CELF2    |
| 1.93E-07 | -1.05683 | 0.96 | 0.917 | 0.00491  | 3 MT2A     |
| 2.08E-07 | -0.83225 | 1    | 0.966 | 0.005302 | 3 CREB5    |
| 2.33E-07 | -0.75373 | 0.6  | 0.841 | 0.005926 | 3 XYLT1    |
| 2.45E-07 | -0.68425 | 0.4  | 0.855 | 0.006244 | 3 ADAMTSL1 |
| 2.70E-07 | -0.54512 | 0.24 | 0.821 | 0.00689  | 3 CMAHP    |
| 2.82E-07 | 0.5343   | 0.96 | 0.759 | 0.007192 | 3 SSPN     |
| 2.83E-07 | 0.813857 | 1    | 0.745 | 0.007196 | 3 GLIPR1   |
| 3.10E-07 | -1.03935 | 0.92 | 0.945 | 0.007884 | 3 CD68     |
| 3.10E-07 | 0.706117 | 0.88 | 0.503 | 0.007897 | 3 OSR2     |
| 3.15E-07 | -0.9087  | 0.56 | 0.89  | 0.008031 | 3 SLC29A1  |
| 3.30E-07 | -0.6185  | 0.8  | 0.931 | 0.0084   | 3 PAPLN    |
| 3.91E-07 | 0.838058 | 1    | 0.945 | 0.009959 | 3 EFEMP1   |
| 3.95E-07 | -0.79771 | 0.08 | 0.641 | 0.010068 | 3 LRRC15   |
| 4.35E-07 | -1.05408 | 0.56 | 0.938 | 0.011081 | 3 UAP1     |
| 4.39E-07 | -0.71728 | 1    | 0.979 | 0.011192 | 3 CD55     |
| 4.71E-07 | 0.522277 | 1    | 0.993 | 0.011992 | 3 MARCKS   |
| 4.98E-07 | 0.567594 | 0.64 | 0.255 | 0.012692 | 3 HGF      |
| 5.09E-07 | -0.84932 | 0.6  | 0.952 | 0.012975 | 3 TMEM196  |
| 6.19E-07 | -0.6072  | 0.92 | 0.993 | 0.015778 | 3 SLC4A7   |
| 6.47E-07 | 0.561402 | 0.88 | 0.572 | 0.016491 | 3 ANTXR1   |
| 7.18E-07 | -0.72223 | 0.76 | 0.931 | 0.018301 | 3 VPS13A   |
| 1.23E-06 | -0.69829 | 0.48 | 0.876 | 0.031422 | 3 EZR      |
| 1.27E-06 | 0.706268 | 1    | 0.972 | 0.032368 | 3 EBF1     |



|          |          |      |       |          |          |
|----------|----------|------|-------|----------|----------|
| 1.42E-06 | -0.57324 | 0.68 | 0.917 | 0.036244 | 3 AK1    |
| 1.44E-06 | 0.990054 | 0.72 | 0.4   | 0.036666 | 3 AOX1   |
| 1.52E-06 | -0.56925 | 0.96 | 0.986 | 0.038626 | 3 ARPC1B |
| 1.58E-06 | 0.538223 | 1    | 0.855 | 0.040341 | 3 DCLK1  |
| 1.69E-06 | -0.66465 | 1    | 0.986 | 0.04311  | 3 KYNU   |
| 1.91E-06 | -0.77169 | 0.96 | 0.952 | 0.048561 | 3 EML1   |
